# Supplementary material for: Isolation and Purification of Bioactive Compounds from the Stem Bark of Jatropha podagrica
Source: MDPI journal article supplement (doi:10.3390/molecules24050889), 2019-03-03

# ESI-MS spectrum (Negative ion mode)

180822\_04 #6 RT: 0.07 AV: 1 NL: 1.21E6  
T: ITMS<sup>-</sup> c ESI Full ms [100.00-2000.00]

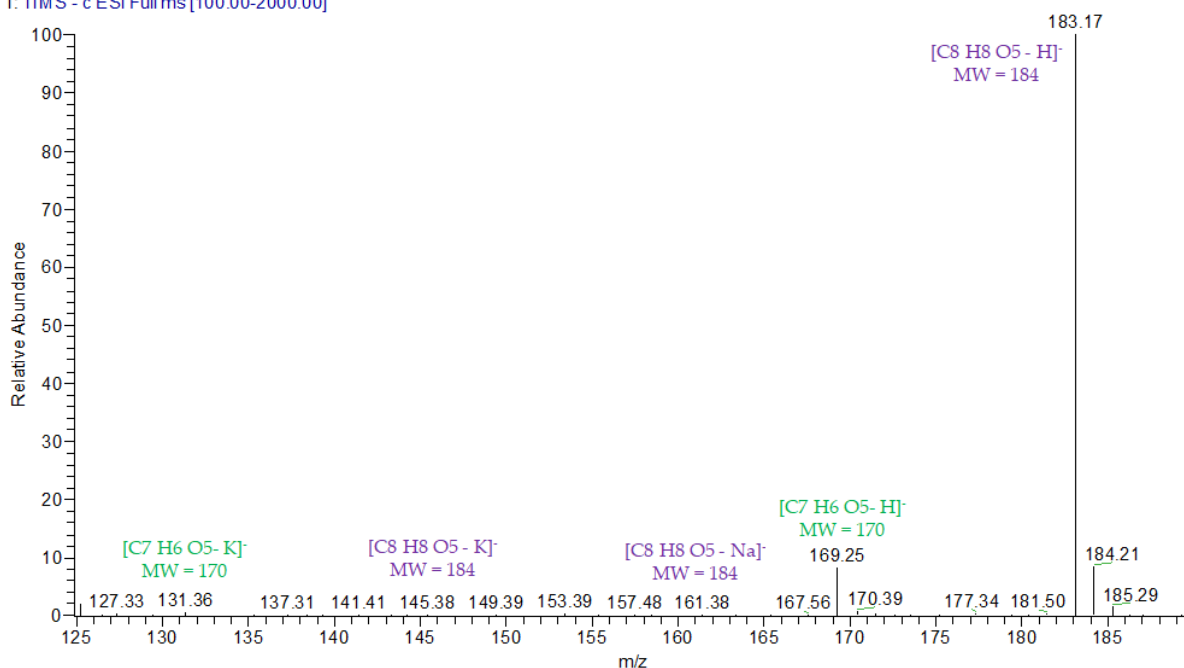

# ESI-MS spectrum (Positive ion mode)

180822\_04 #7 RT: 0.07 AV: 1 NL: 3.85E5  
T: FTMS<sup>+</sup> p ESI Full ms [100.00-2000.00]

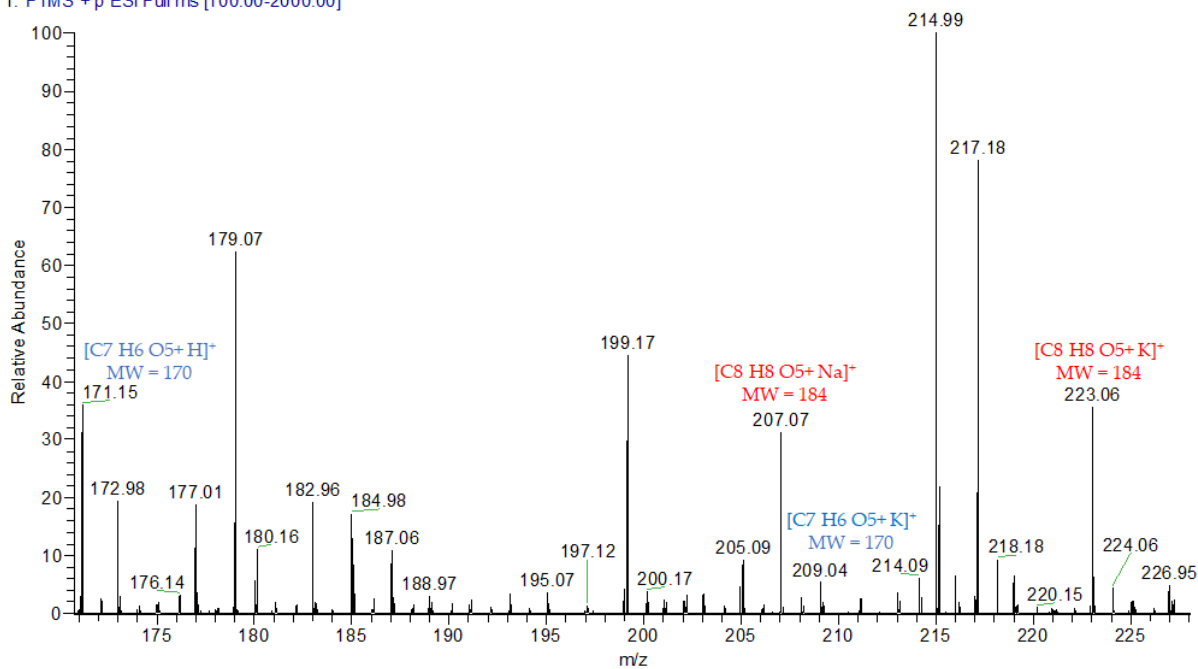

Supplement: s1 [file s1]
