# Supplementary material for: Isolation and Purification of Bioactive Compounds from the Stem Bark of Jatropha podagrica
Source: MDPI journal article supplement (doi:10.3390/molecules24050889), 2019-03-03
Supplement: s1 [file s1]

(Methyl gallate: similarity 87%)

| Peak | m/z    | Relative intensity | Intensity  |
|------|--------|--------------------|------------|
| 1    | 24.04  | 3.31               | 42399.86   |
| 2    | 25.03  | 9.56               | 122587.57  |
| 3    | 26.03  | 1.81               | 23163.05   |
| 4    | 41.04  | 0.96               | 12342.70   |
| 5    | 42.01  | 1.73               | 22181.57   |
| 6    | 42.05  | 1.54               | 19685.94   |
| 7    | 43.02  | 0.93               | 11965.42   |
| 8    | 43.06  | 1.74               | 22371.31   |
| 9    | 44.06  | 1.56               | 20027.24   |
| 10   | 45.04  | 1.64               | 21091.81   |
| 11   | 53.04  | 0.93               | 11935.60   |
| 12   | 79.04  | 16.37              | 209870.30  |
| 13   | 85.02  | 2.09               | 26788.47   |
| 14   | 88.06  | 3.17               | 40619.66   |
| 15   | 95.07  | 1.82               | 23362.05   |
| 16   | 97.04  | 1.84               | 23587.91   |
| 17   | 107.08 | 6.34               | 81245.24   |
| 18   | 124.02 | 1.07               | 13711.45   |
| 19   | 125.05 | 3.01               | 38654.19   |
| 20   | 125.09 | 2.41               | 30906.54   |
| 21   | 126.03 | 1.91               | 24459.26   |
| 22   | 153.05 | 100.00             | 1282224.74 |
| 23   | 184.08 | 0.89               | 11449.47   |

(Fraxetin: similarity 93%)

| Peak | m/z   | Relative intensity | Intensity | Peak | m/z    | Relative intensity | Intensity |
|------|-------|--------------------|-----------|------|--------|--------------------|-----------|
| 1    | 29.04 | 11.08              | 70706     | 40   | 93.08  | 4.54               | 29861     |
| 2    | 39.03 | 4.48               | 28569     | 41   | 94.08  | 3.05               | 19455     |
| 3    | 40.03 | 0.82               | 5236      | 42   | 95.09  | 0.37               | 2349      |
| 4    | 41.04 | 2.80               | 17864     | 43   | 96.1   | 7.70               | 49150     |
| 5    | 42.01 | 0.62               | 3974      | 44   | 97.07  | 0.99               | 6294      |
| 6    | 42.05 | 2.99               | 19074     | 45   | 97.11  | 2.06               | 13176     |
| 7    | 43.02 | 3.75               | 23925     | 46   | 105.08 | 0.81               | 5196      |
| 8    | 43.06 | 7.86               | 50160     | 47   | 107.09 | 2.43               | 15491     |
| 9    | 45.04 | 1.01               | 6443      | 48   | 108.1  | 1.98               | 12628     |
| 10   | 51.03 | 20.90              | 133448    | 49   | 109.05 | 29.68              | 189496    |
| 11   | 53.05 | 11.58              | 73905     | 50   | 109.11 | 5.91               | 37749     |
| 12   | 54.05 | 0.91               | 5840      | 51   | 110.12 | 4.30               | 27461     |
| 13   | 55.02 | 2.34               | 14920     | 52   | 111.09 | 0.64               | 4078      |
| 14   | 55.06 | 7.60               | 48548     | 53   | 111.12 | 0.66               | 4225      |
| 15   | 56.07 | 2.31               | 14720     | 54   | 115.08 | 0.83               | 5287      |
| 16   | 57.08 | 1.96               | 12499     | 55   | 119.09 | 0.58               | 3690      |
| 17   | 59.02 | 7.02               | 44796     | 56   | 121.11 | 1.98               | 12628     |
| 18   | 59.05 | 2.19               | 13970     | 57   | 122.12 | 1.55               | 9912      |
| 19   | 65.04 | 2.69               | 17198     | 58   | 123.09 | 0.68               | 4350      |
| 20   | 66.05 | 2.35               | 14998     | 59   | 123.13 | 2.36               | 15040     |
| 21   | 67.06 | 3.60               | 22988     | 60   | 124.13 | 2.01               | 12857     |
| 22   | 68.07 | 1.97               | 12586     | 61   | 133.11 | 0.66               | 4184      |
| 23   | 69.08 | 10.69              | 68229     | 62   | 135.09 | 0.73               | 4640      |
| 24   | 70.08 | 1.04               | 6666      | 63   | 135.13 | 1.43               | 9152      |
| 25   | 71.06 | 0.60               | 3856      | 64   | 136.1  | 0.94               | 5998      |
| 26   | 73.07 | 1.01               | 6461      | 65   | 136.13 | 1.10               | 7051      |
| 27   | 74.04 | 5.64               | 35973     | 66   | 137.05 | 28.39              | 181274    |
| 28   | 77.05 | 4.93               | 31450     | 67   | 137.14 | 1.01               | 6441      |
| 29   | 78.05 | 1.21               | 7706      | 68   | 138.15 | 1.04               | 6608      |
| 30   | 79.06 | 8.27               | 52772     | 69   | 149.11 | 0.87               | 5575      |
| 31   | 80.07 | 6.61               | 42177     | 70   | 149.14 | 0.77               | 4923      |
| 32   | 81.05 | 32.68              | 208626    | 71   | 150.11 | 2.21               | 14140     |
| 33   | 82.08 | 11.32              | 72234     | 72   | 163.12 | 0.97               | 6190      |
| 34   | 83.06 | 0.69               | 4406      | 73   | 165.05 | 24.30              | 155156    |
| 35   | 83.09 | 4.06               | 25914     | 74   | 180.08 | 20.74              | 132423    |
| 36   | 85.07 | 0.96               | 6127      | 75   | 192.02 | 0.71               | 4534      |
| 37   | 87.05 | 2.52               | 16069     | 76   | 193.06 | 40.01              | 255460    |
| 38   | 91.06 | 3.71               | 23660     | 77   | 208.08 | 100.00             | 638259    |
| 39   | 92.07 | 0.66               | 4226      | 78   | 209.09 | 11.51              | 73494     |
