# Supplementary material for: Isolation and Purification of Bioactive Compounds from the Stem Bark of Jatropha podagrica
Source: MDPI journal article supplement (doi:10.3390/molecules24050889), 2019-03-03
Supplement: s1 [file s1]

(Methyl gallate: similarity 92%)

| Peak | m/z   | Relative intensity | Intensity | Peak | m/z          | Relative intensity | Intensity  |
|------|-------|--------------------|-----------|------|--------------|--------------------|------------|
| 1    | 24.04 | 3.23               | 41446.58  | 13   | 85.02        | 2.04               | 26186.19   |
| 2    | 25.03 | 9.35               | 119831.45 | 14   | 88.06        | 3.10               | 39706.41   |
| 3    | 26.03 | 1.77               | 22642.28  | 15   | 95.07        | 1.78               | 22836.80   |
| 4    | 41.04 | 0.94               | 12065.20  | 16   | <b>97.04</b> | 1.80               | 23057.59   |
| 5    | 42.01 | 1.69               | 21682.86  | 17   | 107.08       | 6.19               | 79418.62   |
| 6    | 42.05 | 1.50               | 19243.35  | 18   | 124.02       | 1.05               | 13403.18   |
| 7    | 43.02 | 0.91               | 11696.41  | 19   | 125.05       | 2.95               | 37785.14   |
| 8    | 43.06 | 1.71               | 21868.34  | 20   | 125.09       | 2.36               | 30211.67   |
| 9    | 44.06 | 1.53               | 19576.97  | 21   | 126.03       | 1.86               | 23909.34   |
| 10   | 45.04 | 1.61               | 20617.60  | 22   | 153.05       | 100.00             | 1282224.74 |
| 11   | 53.04 | 0.91               | 11667.26  | 23   | 184.08       | 0.87               | 11192.05   |
| 12   | 79.04 | 16.00              | 205151.81 |      |              |                    |            |

(Tomentin: similarity 90%)

| Peak | m/z   | Relative intensity | Intensity | Peak | m/z    | Relative intensity | Intensity  |
|------|-------|--------------------|-----------|------|--------|--------------------|------------|
| 1    | 29.04 | 5.11               | 78347.52  | 19   | 65.04  | 0.92               | 14088.74   |
| 2    | 39.03 | 2.04               | 31278.73  | 20   | 66.05  | 1.09               | 16646.44   |
| 3    | 40.03 | 3.34               | 51100.55  | 21   | 67.06  | 1.01               | 15514.19   |
| 4    | 41.04 | 9.39               | 143826.97 | 22   | 68.07  | 0.91               | 13968.80   |
| 5    | 42.01 | 3.25               | 49810.56  | 23   | 69.08  | 1.03               | 15727.72   |
| 6    | 42.05 | 1.51               | 23170.24  | 24   | 93.08  | 0.48               | 7399.04    |
| 7    | 43.02 | 1.54               | 23554.38  | 25   | 94.08  | 0.93               | 14279.56   |
| 8    | 43.06 | 3.71               | 56793.17  | 26   | 95.09  | 0.47               | 7171.46    |
| 9    | 45.04 | 4.64               | 71051.48  | 27   | 96.1   | 1.30               | 19927.04   |
| 10   | 51.03 | 5.15               | 78915.05  | 28   | 97.07  | 0.97               | 14907.02   |
| 11   | 53.05 | 5.82               | 89207.72  | 29   | 132.13 | 0.56               | 8552.46    |
| 12   | 54.01 | 12.96              | 198482.07 | 30   | 133.99 | 20.79              | 318571.72  |
| 13   | 55.02 | 0.82               | 12559.85  | 31   | 151.14 | 3.06               | 46813.20   |
| 14   | 55.06 | 0.91               | 13883.63  | 32   | 194.05 | 100.00             | 1532043.00 |
| 15   | 56.07 | 1.07               | 16337.83  | 33   | 195.03 | 4.71               | 72191.61   |
| 16   | 57.08 | 0.91               | 13873.33  | 34   | 208.08 | 6.98               | 106962.73  |
| 17   | 59.02 | 0.90               | 13719.52  | 35   | 209.02 | 19.52              | 299032.23  |
| 18   | 59.05 | 1.01               | 15505.23  | 36   | 225.05 | 26.99              | 413509.08  |

(Fraxetin: similarity 86%)

| Peak | m/z   | Relative intensity | Intensity | Peak | m/z    | Relative intensity | Intensity |
|------|-------|--------------------|-----------|------|--------|--------------------|-----------|
| 1    | 29.04 | 11.08              | 71413     | 40   | 93.08  | 4.54               | 29861     |
| 2    | 39.03 | 4.48               | 28854     | 41   | 94.08  | 3.05               | 20032     |
| 3    | 40.03 | 0.82               | 5288      | 42   | 95.09  | 0.37               | 2418      |
| 4    | 41.04 | 2.80               | 18042     | 43   | 96.1   | 7.70               | 50609     |
| 5    | 42.01 | 0.62               | 4014      | 44   | 97.07  | 0.99               | 6481      |
| 6    | 42.05 | 2.99               | 19265     | 45   | 97.11  | 2.06               | 13567     |
| 7    | 43.02 | 3.75               | 24164     | 46   | 105.08 | 0.81               | 5350      |
| 8    | 43.06 | 7.86               | 50662     | 47   | 107.09 | 2.43               | 15951     |
| 9    | 45.04 | 1.01               | 6508      | 48   | 108.1  | 1.98               | 13003     |
| 10   | 51.03 | 20.90              | 134782    | 49   | 109.05 | 29.68              | 195122    |
| 11   | 53.05 | 11.58              | 74644     | 50   | 109.11 | 5.91               | 38870     |
| 12   | 54.05 | 0.91               | 5899      | 51   | 110.12 | 4.30               | 28277     |
| 13   | 55.02 | 2.34               | 15069     | 52   | 111.09 | 0.64               | 4199      |
| 14   | 55.06 | 7.60               | 49033     | 53   | 111.12 | 0.66               | 4351      |
| 15   | 56.07 | 2.31               | 14867     | 54   | 115.08 | 0.83               | 5444      |
| 16   | 57.08 | 1.96               | 12624     | 55   | 119.09 | 0.58               | 3800      |
| 17   | 59.02 | 7.02               | 45244     | 56   | 121.11 | 1.98               | 13003     |
| 18   | 59.05 | 2.19               | 14109     | 57   | 122.12 | 1.55               | 10206     |
| 19   | 65.04 | 2.69               | 17370     | 58   | 123.09 | 0.68               | 4479      |
| 20   | 66.05 | 2.35               | 15148     | 59   | 123.13 | 2.36               | 15486     |
| 21   | 67.06 | 3.60               | 23217     | 60   | 124.13 | 2.01               | 13239     |
| 22   | 68.07 | 1.97               | 12711     | 61   | 133.11 | 0.66               | 4308      |
| 23   | 69.08 | 10.69              | 68911     | 62   | 135.09 | 0.73               | 4778      |
| 24   | 70.08 | 1.04               | 6733      | 63   | 135.13 | 1.43               | 9423      |
| 25   | 71.06 | 0.60               | 3894      | 64   | 136.1  | 0.94               | 6176      |
| 26   | 73.07 | 1.01               | 6526      | 65   | 136.13 | 1.10               | 7260      |
| 27   | 74.04 | 5.64               | 36333     | 66   | 137.05 | 28.39              | 186657    |
| 28   | 77.05 | 4.93               | 31765     | 67   | 137.14 | 1.01               | 6632      |
| 29   | 78.05 | 1.21               | 7783      | 68   | 138.15 | 1.04               | 6804      |
| 30   | 79.06 | 8.27               | 53299     | 69   | 149.11 | 0.87               | 5740      |
| 31   | 80.07 | 6.61               | 42599     | 70   | 149.14 | 0.77               | 5070      |
| 32   | 81.05 | 32.68              | 210712    | 71   | 150.11 | 2.21               | 14560     |
| 33   | 82.08 | 11.32              | 72957     | 72   | 163.12 | 0.97               | 6374      |
| 34   | 83.06 | 0.69               | 4450      | 73   | 165.05 | 24.30              | 159762    |
| 35   | 83.09 | 4.06               | 26173     | 74   | 180.08 | 20.74              | 136354    |
| 36   | 85.07 | 0.96               | 6188      | 75   | 192.02 | 0.71               | 4669      |
| 37   | 87.05 | 2.52               | 16230     | 76   | 193.06 | 40.01              | 263044    |
| 38   | 91.06 | 3.71               | 23896     | 77   | 208.08 | 100.00             | 638259    |
| 39   | 92.07 | 0.66               | 4226      | 78   | 209.09 | 11.51              | 73568     |
