# Supplementary material for: Isolation and Purification of Bioactive Compounds from the Stem Bark of Jatropha podagrica
Source: MDPI journal article supplement (doi:10.3390/molecules24050889), 2019-03-03
Supplement: s1 [file s1]

(Gallic acid: similarity 91%)

| Peak | m/z    | Relative intensity | Intensity |
|------|--------|--------------------|-----------|
| 1    | 29.05  | 10.69              | 1350.84   |
| 2    | 53.05  | 9.74               | 1230.21   |
| 3    | 55.03  | 14.50              | 1831.55   |
| 4    | 79.08  | 78.18              | 9875.72   |
| 5    | 124.01 | 26.53              | 3351.81   |
| 6    | 152.02 | 100.00             | 12632.34  |
| 7    | 152.04 | 11.01              | 1391.06   |
| 8    | 170.12 | 64.37              | 8131.58   |

(Methyl gallate: similarity 87%)

| Peak | m/z    | Relative intensity | Intensity  |
|------|--------|--------------------|------------|
| 1    | 24.04  | 2.90               | 37238.62   |
| 2    | 25.03  | 8.56               | 109820.44  |
| 3    | 26.03  | 1.59               | 20343.47   |
| 4    | 41.04  | 0.85               | 10840.25   |
| 5    | 42.01  | 1.52               | 19481.46   |
| 6    | 42.05  | 1.35               | 17289.62   |
| 7    | 43.02  | 0.82               | 10508.90   |
| 8    | 43.06  | 1.53               | 19648.10   |
| 9    | 44.06  | 1.37               | 17589.37   |
| 10   | 45.04  | 1.44               | 18524.35   |
| 11   | 53.04  | 0.82               | 10482.71   |
| 12   | 79.04  | 14.36              | 184163.28  |
| 13   | 85.02  | 1.83               | 23527.57   |
| 14   | 88.06  | 2.78               | 35675.12   |
| 15   | 95.07  | 1.60               | 20518.24   |
| 16   | 97.04  | 1.62               | 20716.61   |
| 17   | 107.08 | 5.56               | 71355.45   |
| 18   | 124.02 | 0.94               | 12042.39   |
| 19   | 125.05 | 2.65               | 33948.91   |
| 20   | 125.09 | 2.12               | 27144.36   |
| 21   | 126.03 | 1.68               | 21481.89   |
| 22   | 153.05 | 100.00             | 1282224.74 |
| 23   | 153.08 | 0.78               | 10055.75   |
| 24   | 158.02 | 1.29               | 16575.11   |
| 25   | 184.08 | 47.45              | 608413.28  |
