# Supplementary material for: Isolation and Purification of Bioactive Compounds from the Stem Bark of Jatropha podagrica
Source: MDPI journal article supplement (doi:10.3390/molecules24050889), 2019-03-03
Supplement: s1 [file s1]

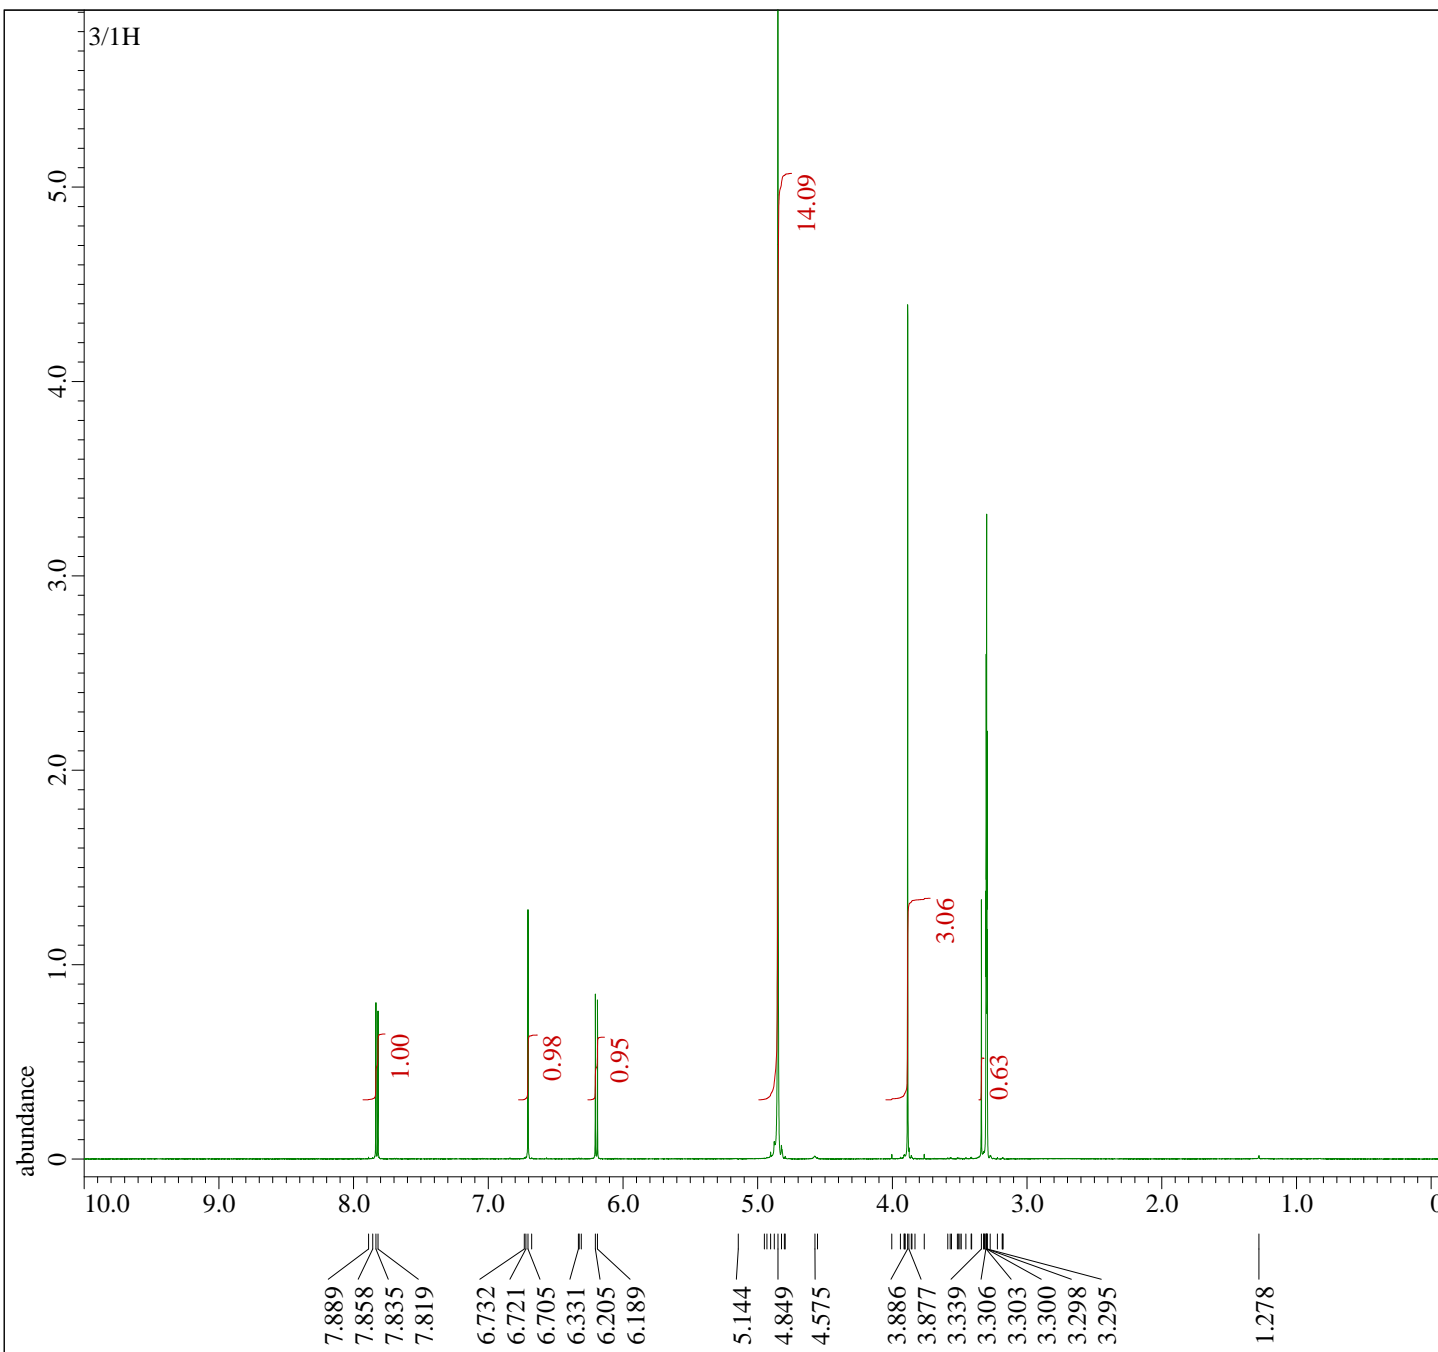

X : parts per Million : Proton

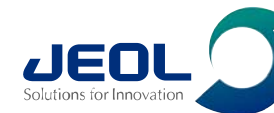

Filename = 171003\_3\_1H-1-4.jdf  
Author = delta  
Experiment = proton.jxp  
Sample\_Id = 171003\_3  
Solvent = METHANOL-D4  
Creation\_Time = 4-OCT-2017 01:05:35  
Revision\_Time = 4-OCT-2017 09:41:30  
Current\_Time = 4-OCT-2017 09:42:03

Comment = 3/1H  
Data\_Format = 1D COMPLEX  
Dim\_Size = 26214  
Dim\_Title = Proton  
Dim\_Units = [ppm]  
Dimensions = X  
Spectrometer = DELTA2\_NMR

Field\_Strength = 14.09636928[T] (600[MHz])  
X\_Acq\_Duration = 2.9097984[s]  
X\_Domain = 1H  
X\_Freq = 600.1723046[MHz]  
X\_Offset = 5[ppm]  
X\_Points = 32768  
X\_Prescans = 1  
X\_Resolution = 0.34366642[Hz]  
X\_Sweep = 11.26126126[kHz]  
X\_Sweep\_Clippped = 9.00900901[kHz]  
Irr\_Domain = Proton  
Irr\_Freq = 600.1723046[MHz]  
Irr\_Offset = 5[ppm]  
Tri\_Domain = Proton  
Tri\_Freq = 600.1723046[MHz]  
Tri\_Offset = 5[ppm]  
Clipped = FALSE  
Scans = 32  
Total\_Scans = 32

Relaxation\_Delay = 5[s]  
Recvr\_Gain = 50  
Temp\_Get = 24[dC]  
X\_90\_Width = 13.5[us]  
X\_Acq\_Time = 2.9097984[s]  
X\_Angle = 45[deg]  
X\_Atn = 9.8[dB]  
X\_Pulse = 6.75[us]  
Irr\_Mode = Off  
Tri\_Mode = Off  
Dante\_Presat = FALSE  
Initial\_Wait = 1[s]  
Repetition\_Time = 7.9097984[s]
