# Supplementary material for: Isolation and Purification of Bioactive Compounds from the Stem Bark of Jatropha podagrica
Source: MDPI journal article supplement (doi:10.3390/molecules24050889), 2019-03-03
Supplement: s1 [file s1]

(Fraxetin: similarity 97%)

| Peak | m/z   | Relative intensity | Intensity | Peak | m/z    | Relative intensity | Intensity |
|------|-------|--------------------|-----------|------|--------|--------------------|-----------|
| 1    | 29.04 | 11.08              | 70692     | 40   | 93.08  | 4.54               | 28991     |
| 2    | 39.03 | 4.48               | 28563     | 41   | 94.08  | 3.05               | 19449     |
| 3    | 40.03 | 0.82               | 5235      | 42   | 95.09  | 0.37               | 2348      |
| 4    | 41.04 | 2.80               | 17860     | 43   | 96.1   | 7.70               | 49135     |
| 5    | 42.01 | 0.62               | 3973      | 44   | 97.07  | 0.99               | 6292      |
| 6    | 42.05 | 2.99               | 19070     | 45   | 97.11  | 2.06               | 13172     |
| 7    | 43.02 | 3.75               | 23920     | 46   | 105.08 | 0.81               | 5194      |
| 8    | 43.06 | 7.86               | 50150     | 47   | 107.09 | 2.43               | 15486     |
| 9    | 45.04 | 1.01               | 6442      | 48   | 108.1  | 1.98               | 12624     |
| 10   | 51.03 | 20.90              | 133421    | 49   | 109.05 | 29.68              | 189439    |
| 11   | 53.05 | 11.58              | 73890     | 50   | 109.11 | 5.91               | 37738     |
| 12   | 54.05 | 0.91               | 5839      | 51   | 110.12 | 4.30               | 27453     |
| 13   | 55.02 | 2.34               | 14917     | 52   | 111.09 | 0.64               | 4077      |
| 14   | 55.06 | 7.60               | 48538     | 53   | 111.12 | 0.66               | 4224      |
| 15   | 56.07 | 2.31               | 14717     | 54   | 115.08 | 0.83               | 5285      |
| 16   | 57.08 | 1.96               | 12497     | 55   | 119.09 | 0.58               | 3689      |
| 17   | 59.02 | 7.02               | 44787     | 56   | 121.11 | 1.98               | 12624     |
| 18   | 59.05 | 2.19               | 13967     | 57   | 122.12 | 1.55               | 9909      |
| 19   | 65.04 | 2.69               | 17195     | 58   | 123.09 | 0.68               | 4349      |
| 20   | 66.05 | 2.35               | 14995     | 59   | 123.13 | 2.36               | 15035     |
| 21   | 67.06 | 3.60               | 22983     | 60   | 124.13 | 2.01               | 12853     |
| 22   | 68.07 | 1.97               | 12583     | 61   | 133.11 | 0.66               | 4183      |
| 23   | 69.08 | 10.69              | 68215     | 62   | 135.09 | 0.73               | 4639      |
| 24   | 70.08 | 1.04               | 6665      | 63   | 135.13 | 1.43               | 9149      |
| 25   | 71.06 | 0.60               | 3855      | 64   | 136.1  | 0.94               | 5996      |
| 26   | 73.07 | 1.01               | 6460      | 65   | 136.13 | 1.10               | 7049      |
| 27   | 74.04 | 5.64               | 35966     | 66   | 137.05 | 28.39              | 181220    |
| 28   | 77.05 | 4.93               | 31444     | 67   | 137.14 | 1.01               | 6439      |
| 29   | 78.05 | 1.21               | 7704      | 68   | 138.15 | 1.04               | 6606      |
| 30   | 79.06 | 8.27               | 52761     | 69   | 149.11 | 0.87               | 5573      |
| 31   | 80.07 | 6.61               | 42169     | 70   | 149.14 | 0.77               | 4922      |
| 32   | 81.05 | 32.68              | 208584    | 71   | 150.11 | 2.21               | 14136     |
| 33   | 82.08 | 11.32              | 72220     | 72   | 163.12 | 0.97               | 6188      |
| 34   | 83.06 | 0.69               | 4405      | 73   | 165.05 | 24.30              | 155109    |
| 35   | 83.09 | 4.06               | 25909     | 74   | 180.08 | 20.74              | 132383    |
| 36   | 85.07 | 0.96               | 6126      | 75   | 192.02 | 0.71               | 4533      |
| 37   | 87.05 | 2.52               | 16066     | 76   | 193.06 | 40.01              | 255383    |
| 38   | 91.06 | 3.71               | 23655     | 77   | 208.08 | 100.00             | 638259    |
| 39   | 92.07 | 0.66               | 4225      | 78   | 209.09 | 11.51              | 73472     |
