# Supplementary figures and images for: Isolation and Purification of Bioactive Compounds from the Stem Bark of Jatropha podagrica
Source: MDPI journal article supplement (doi:10.3390/molecules24050889), 2019-03-03

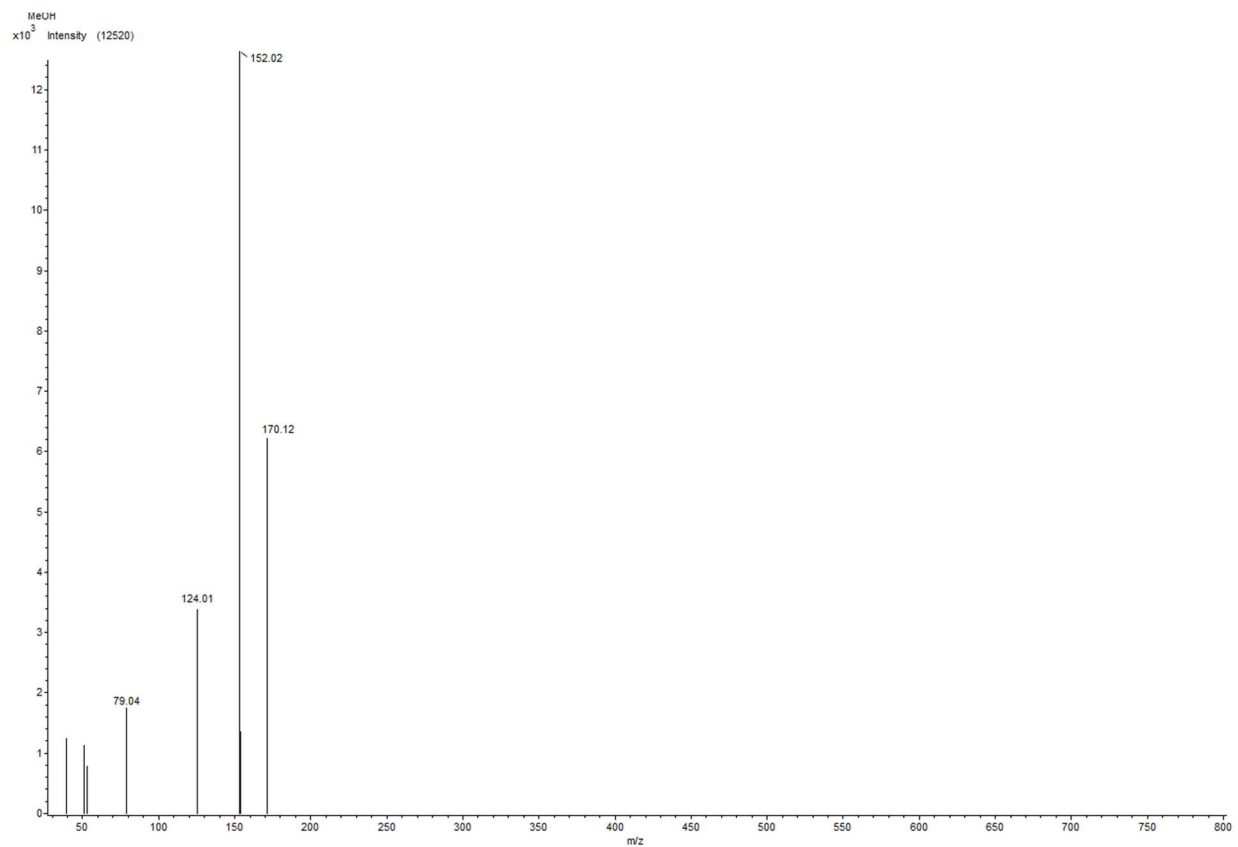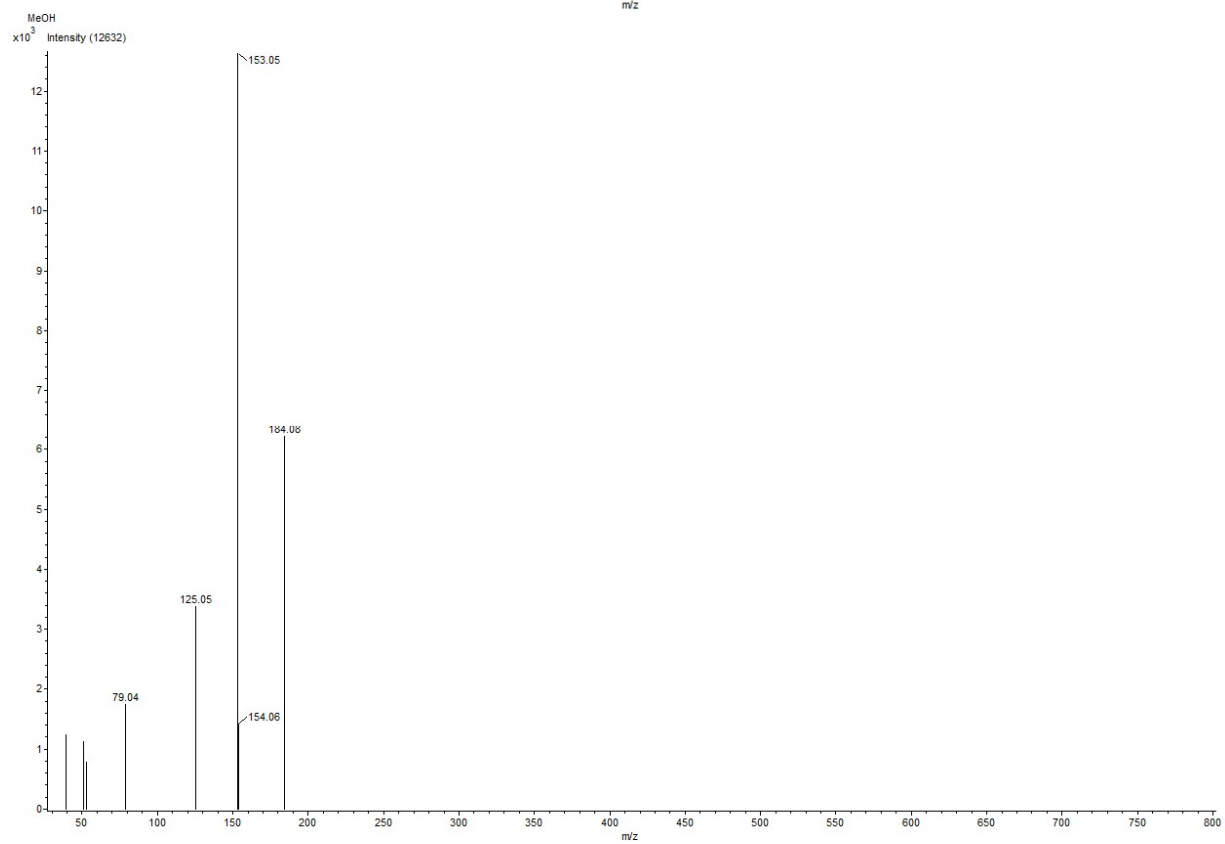

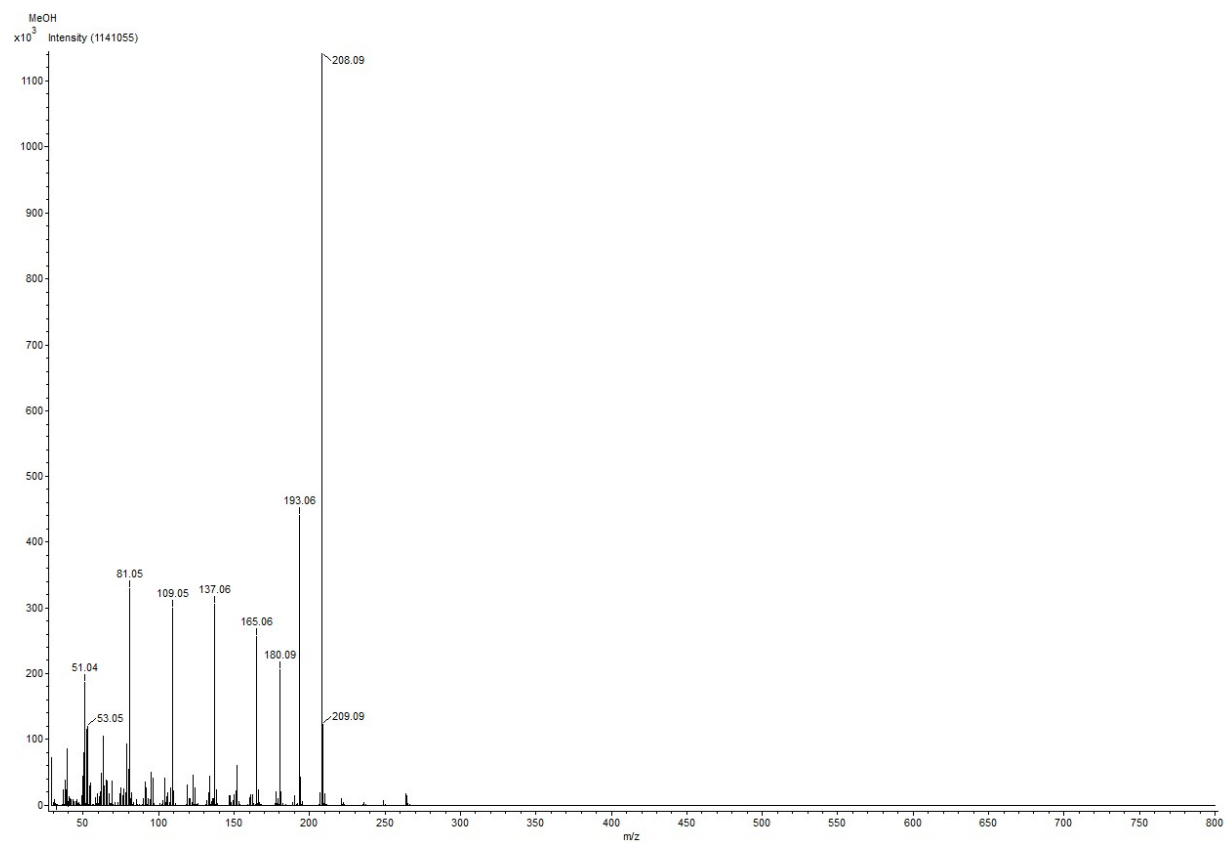

Supplement: s1 [file s1]

# ESI-MS spectrum (Negative ion mode)

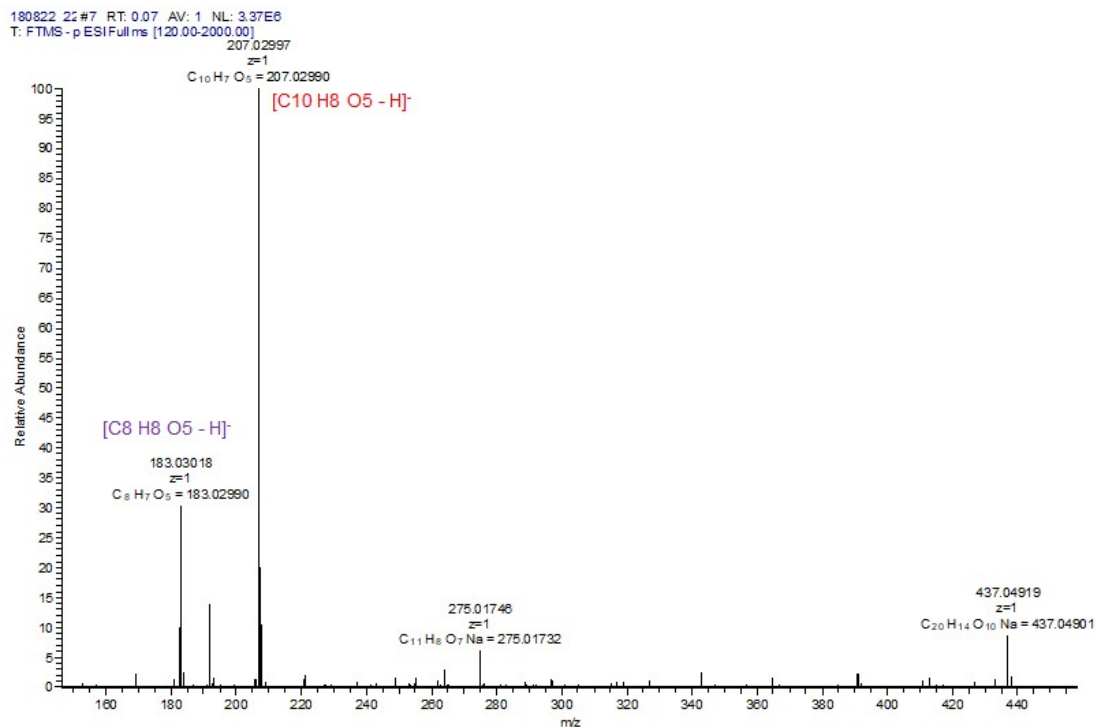

# ESI-MS spectrum (Positive ion mode)

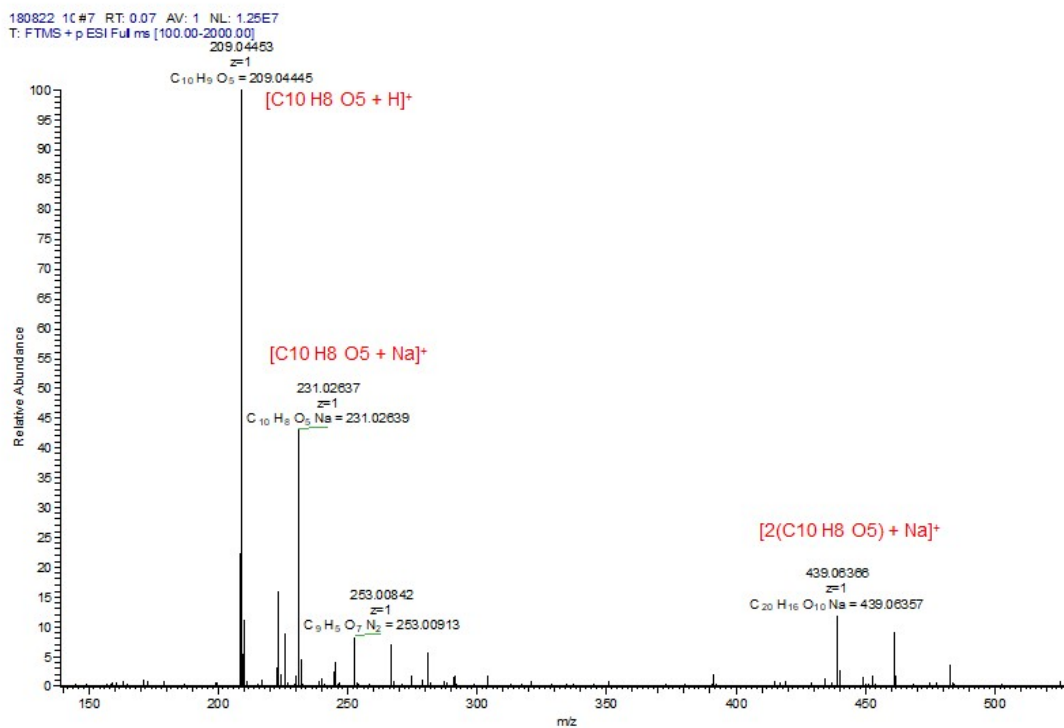

Supplement: s1 [file s1]

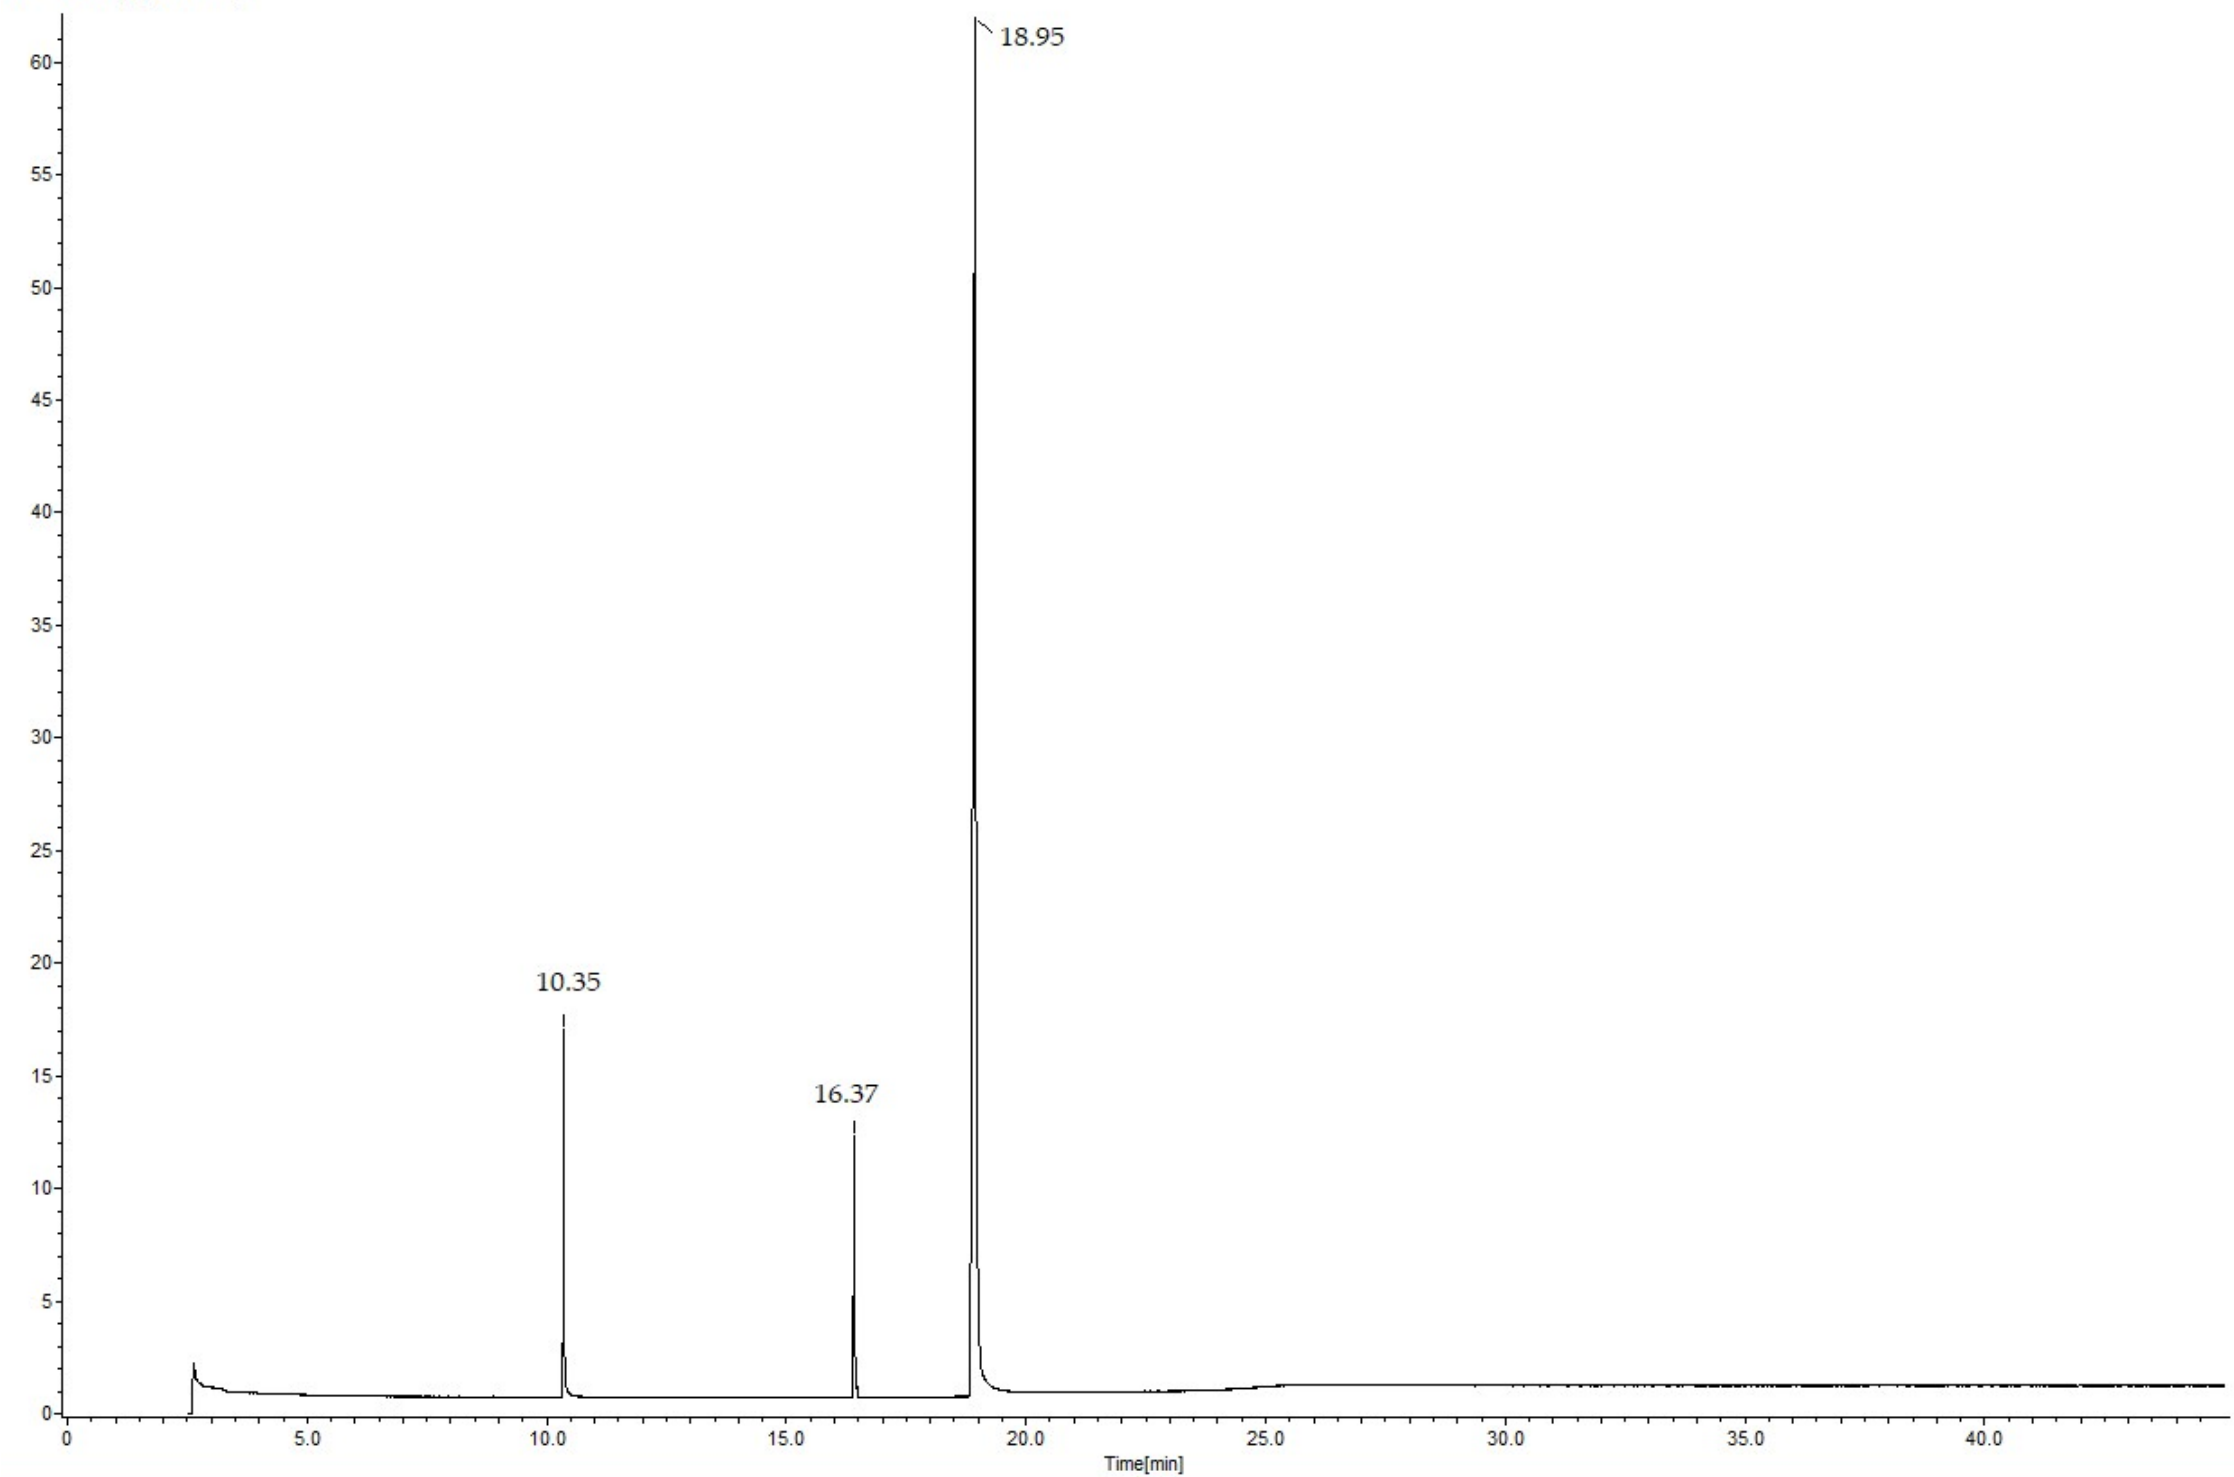

Supplement: s1 [file s1]

## ESI-MS spectrum (Negative ion mode)

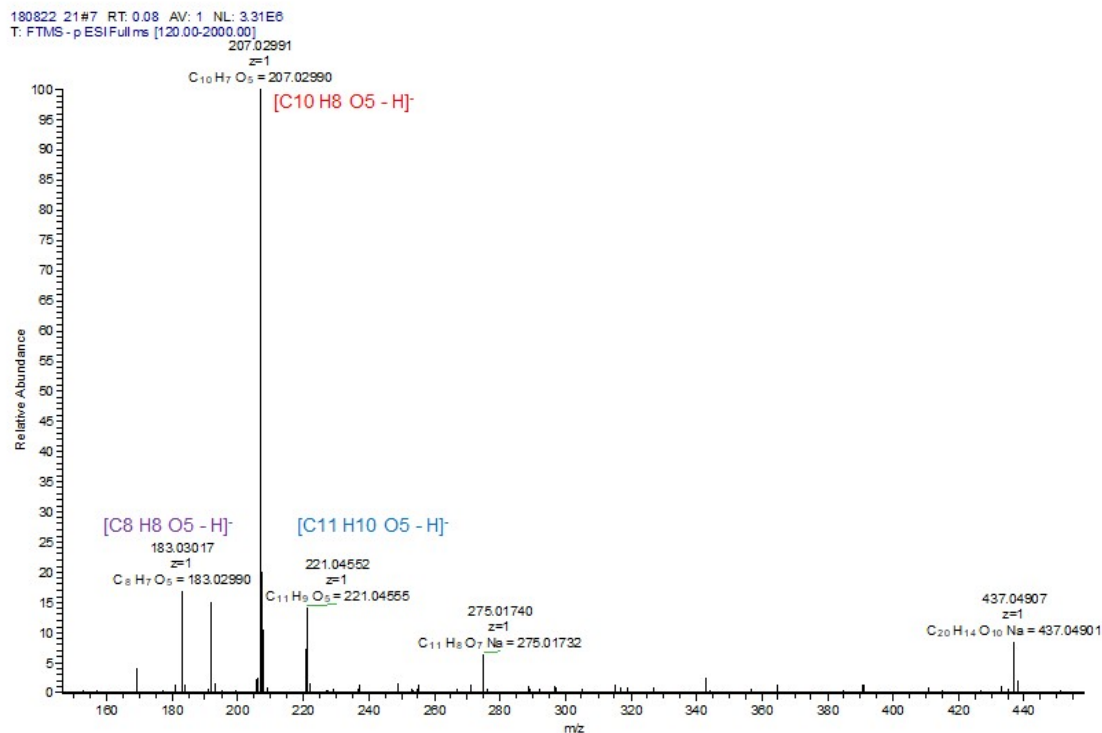

## ESI-MS spectrum (Positive ion mode)

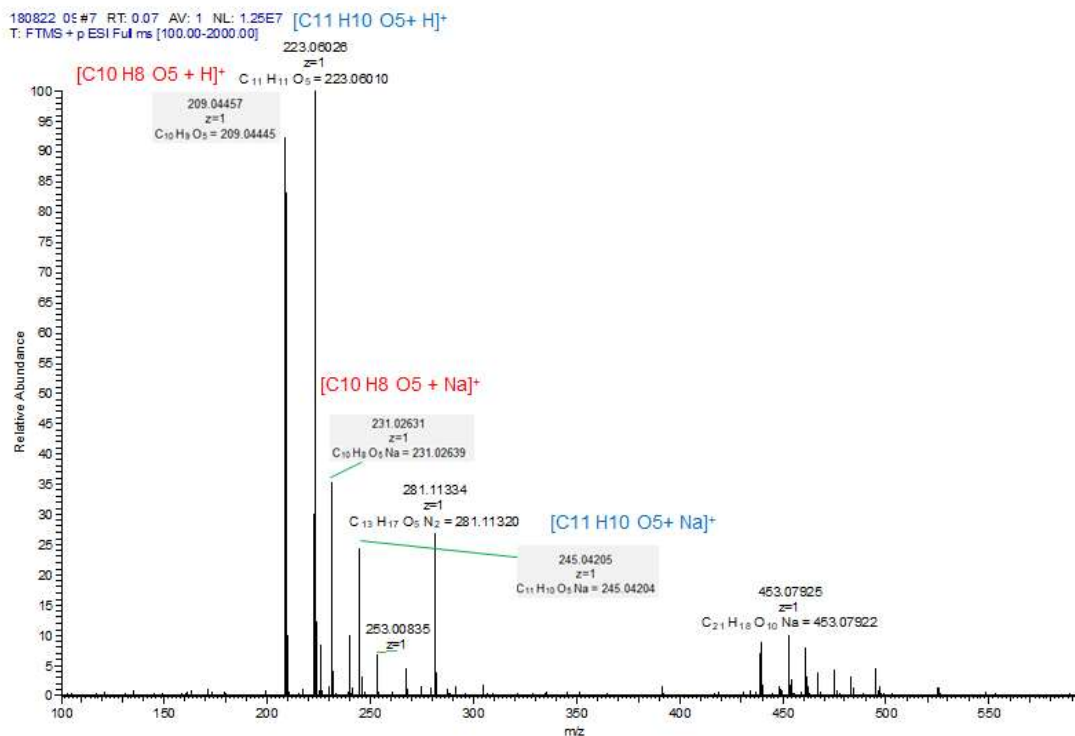

Supplement: s1 [file s1]

## ESI-MS spectrum (Negative ion mode)

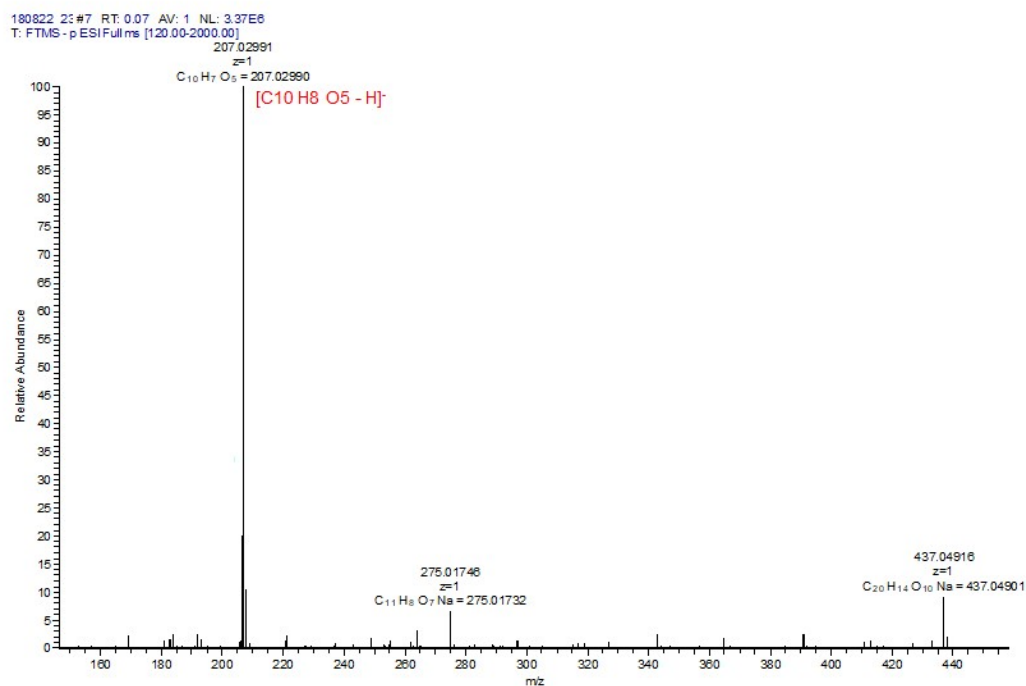

## ESI-MS spectrum (Positive ion mode)

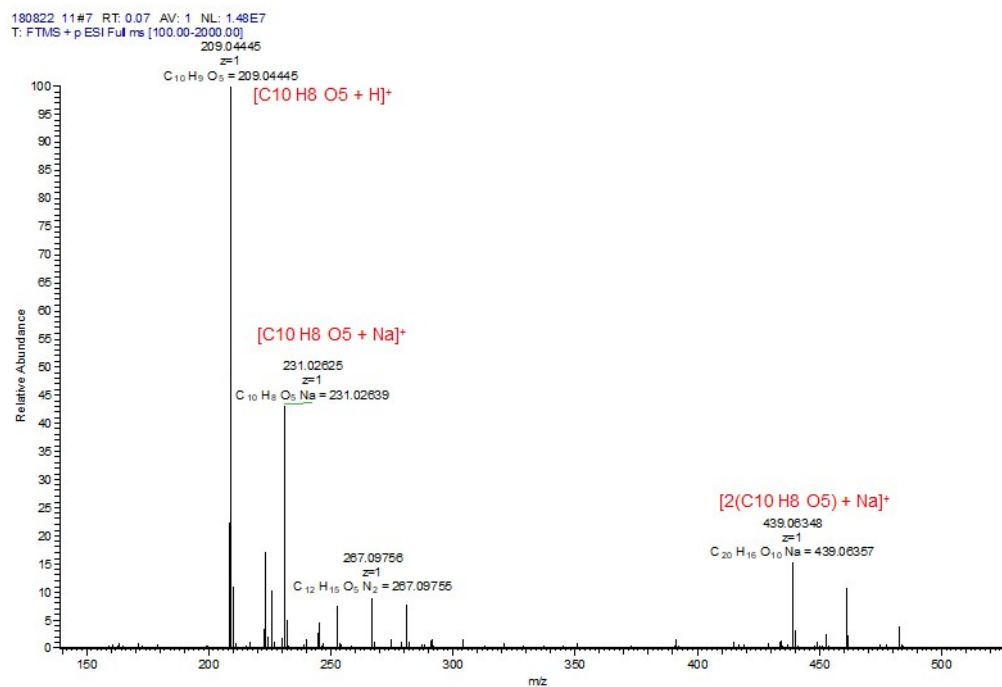

Supplement: s1 [file s1]

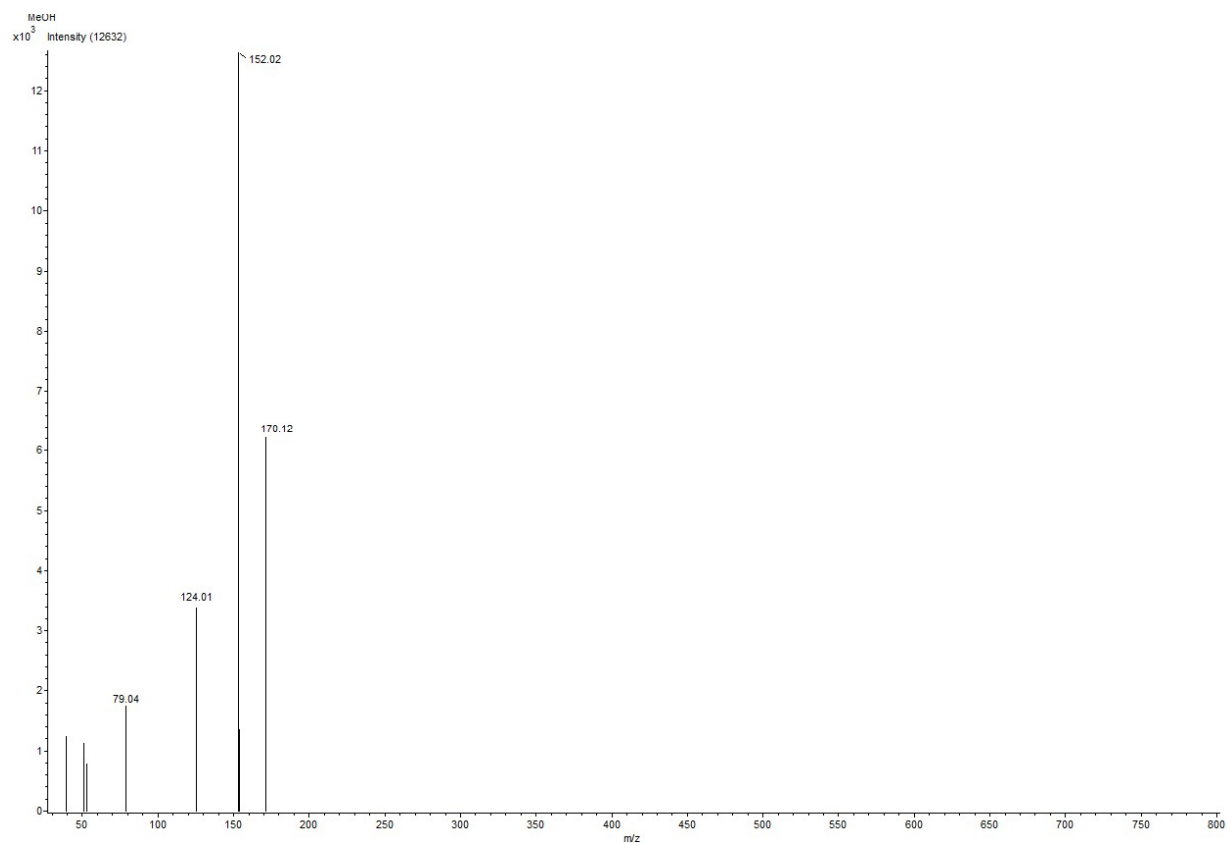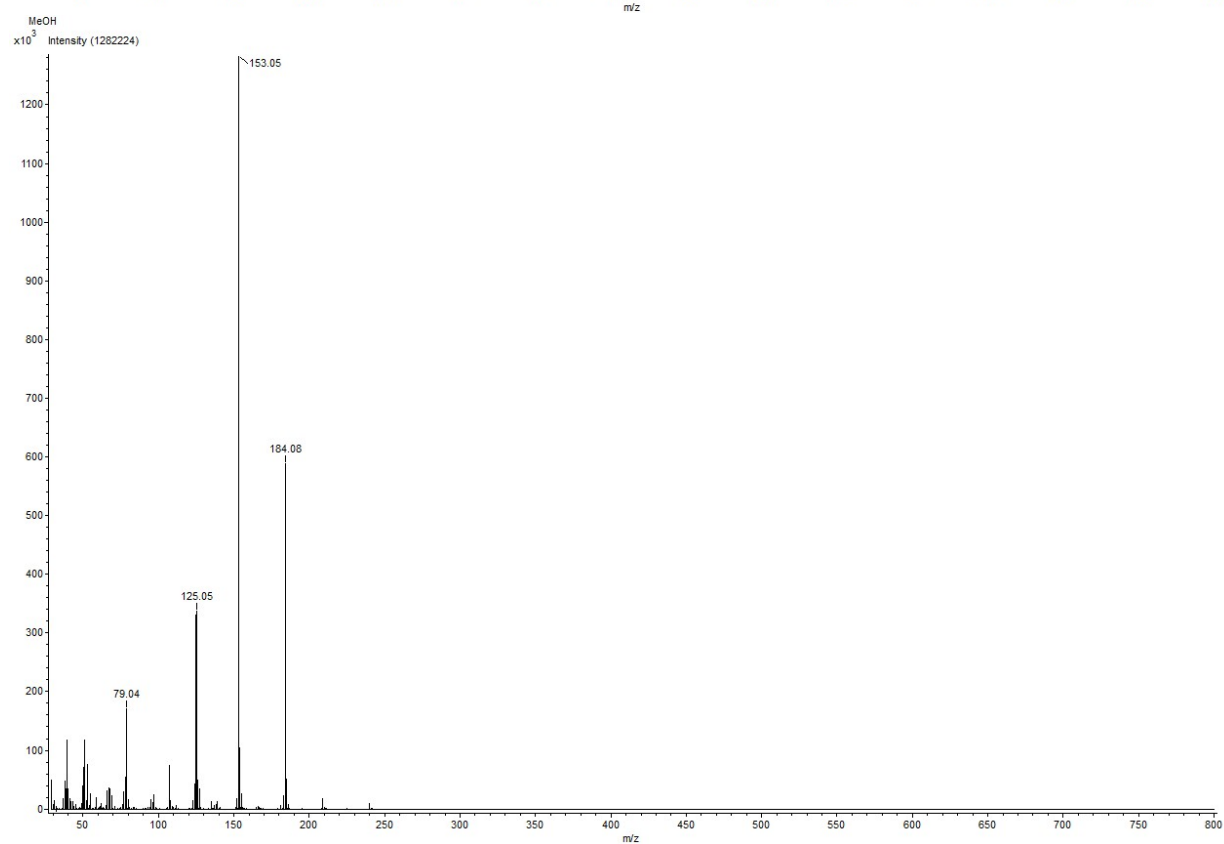

Supplement: s1 [file s1]

181225\_04#610 RT: 7.93 AV: 1 NL: 6.64E5  
T: ITMS - c ESI Full ms [115.00-1000.00]

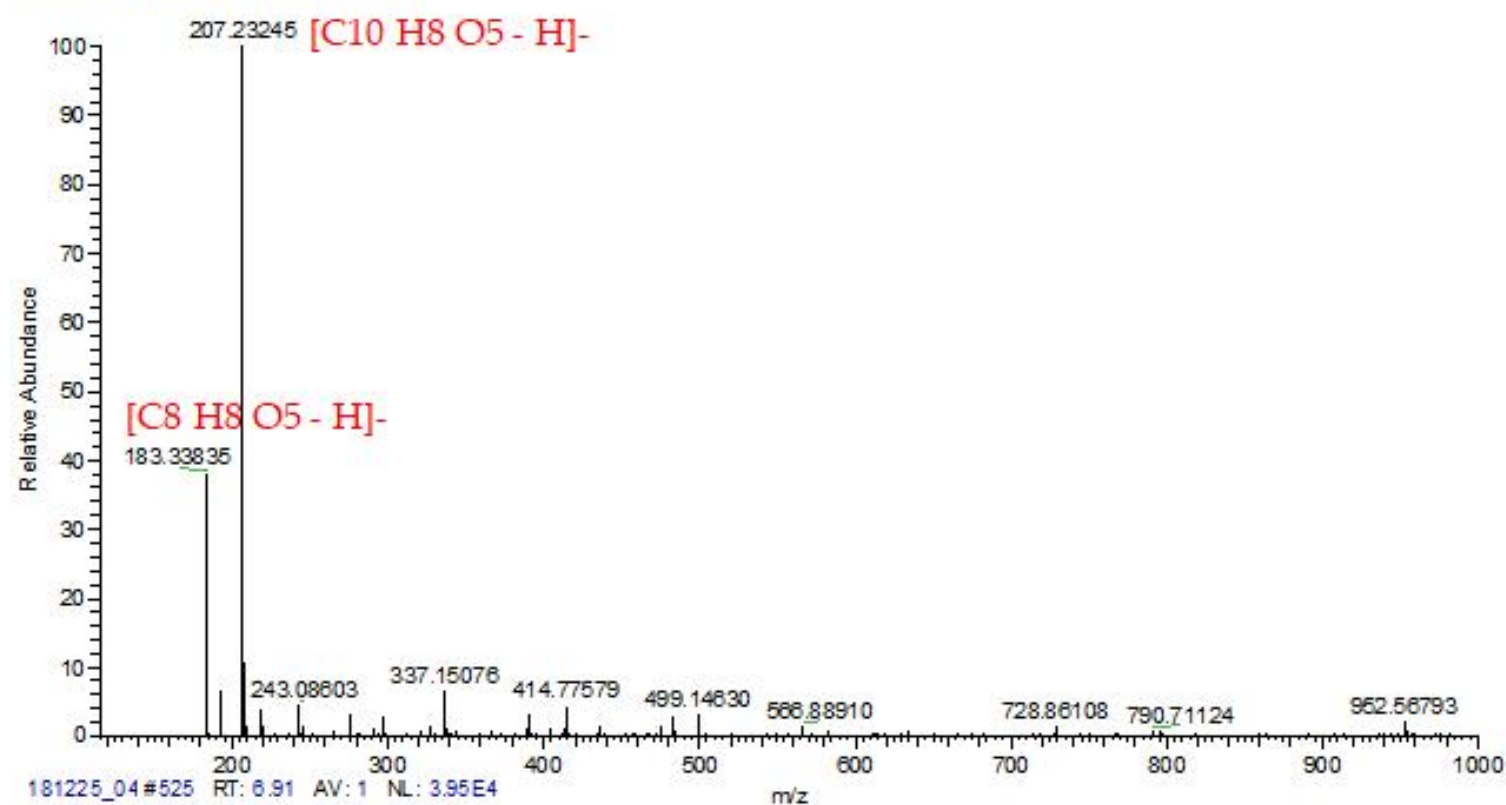

181225\_04#525 RT: 6.91 AV: 1 NL: 3.95E4  
T: ITMS - c ESI Full ms [115.00-1000.00]

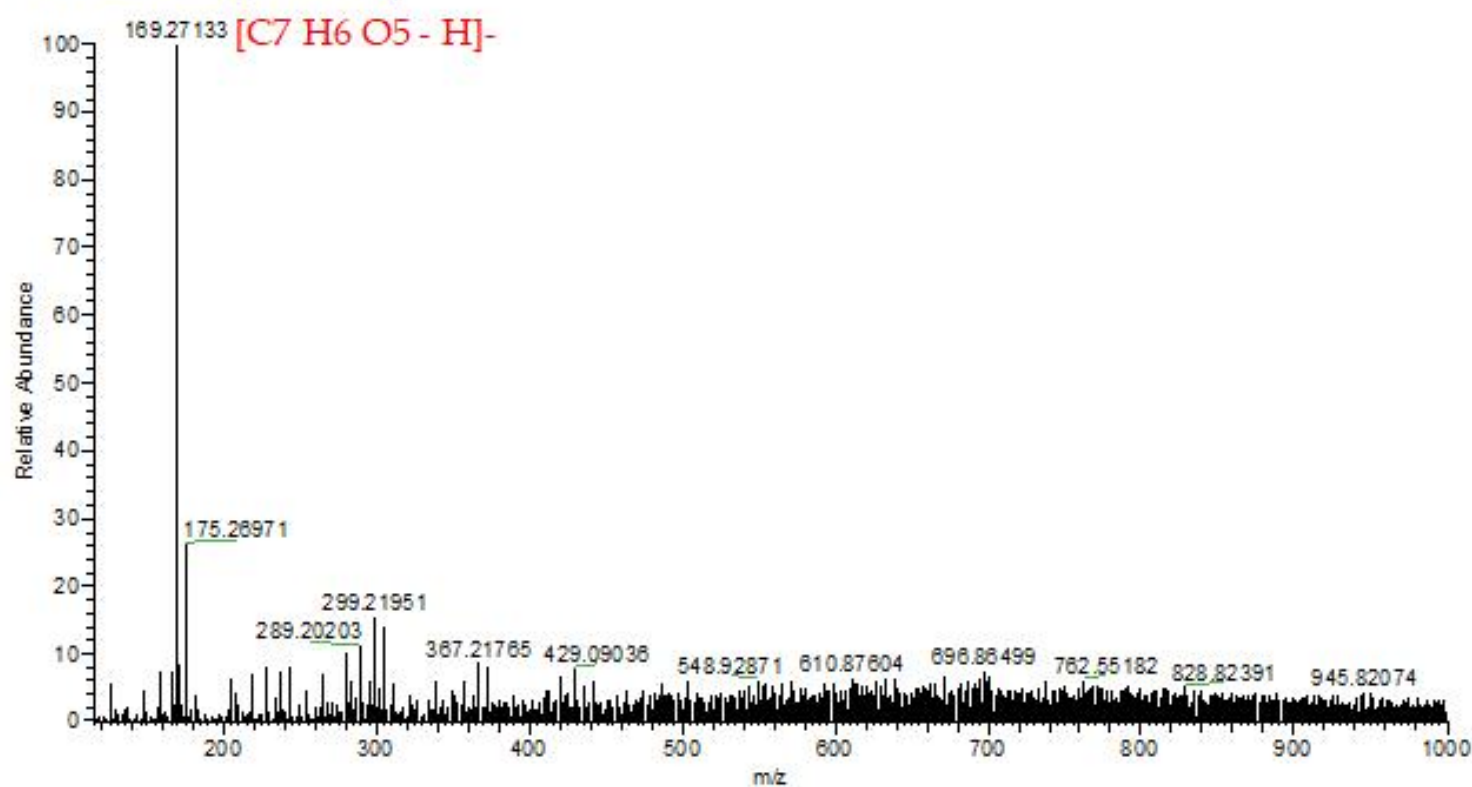

Supplement: s1 [file s1]

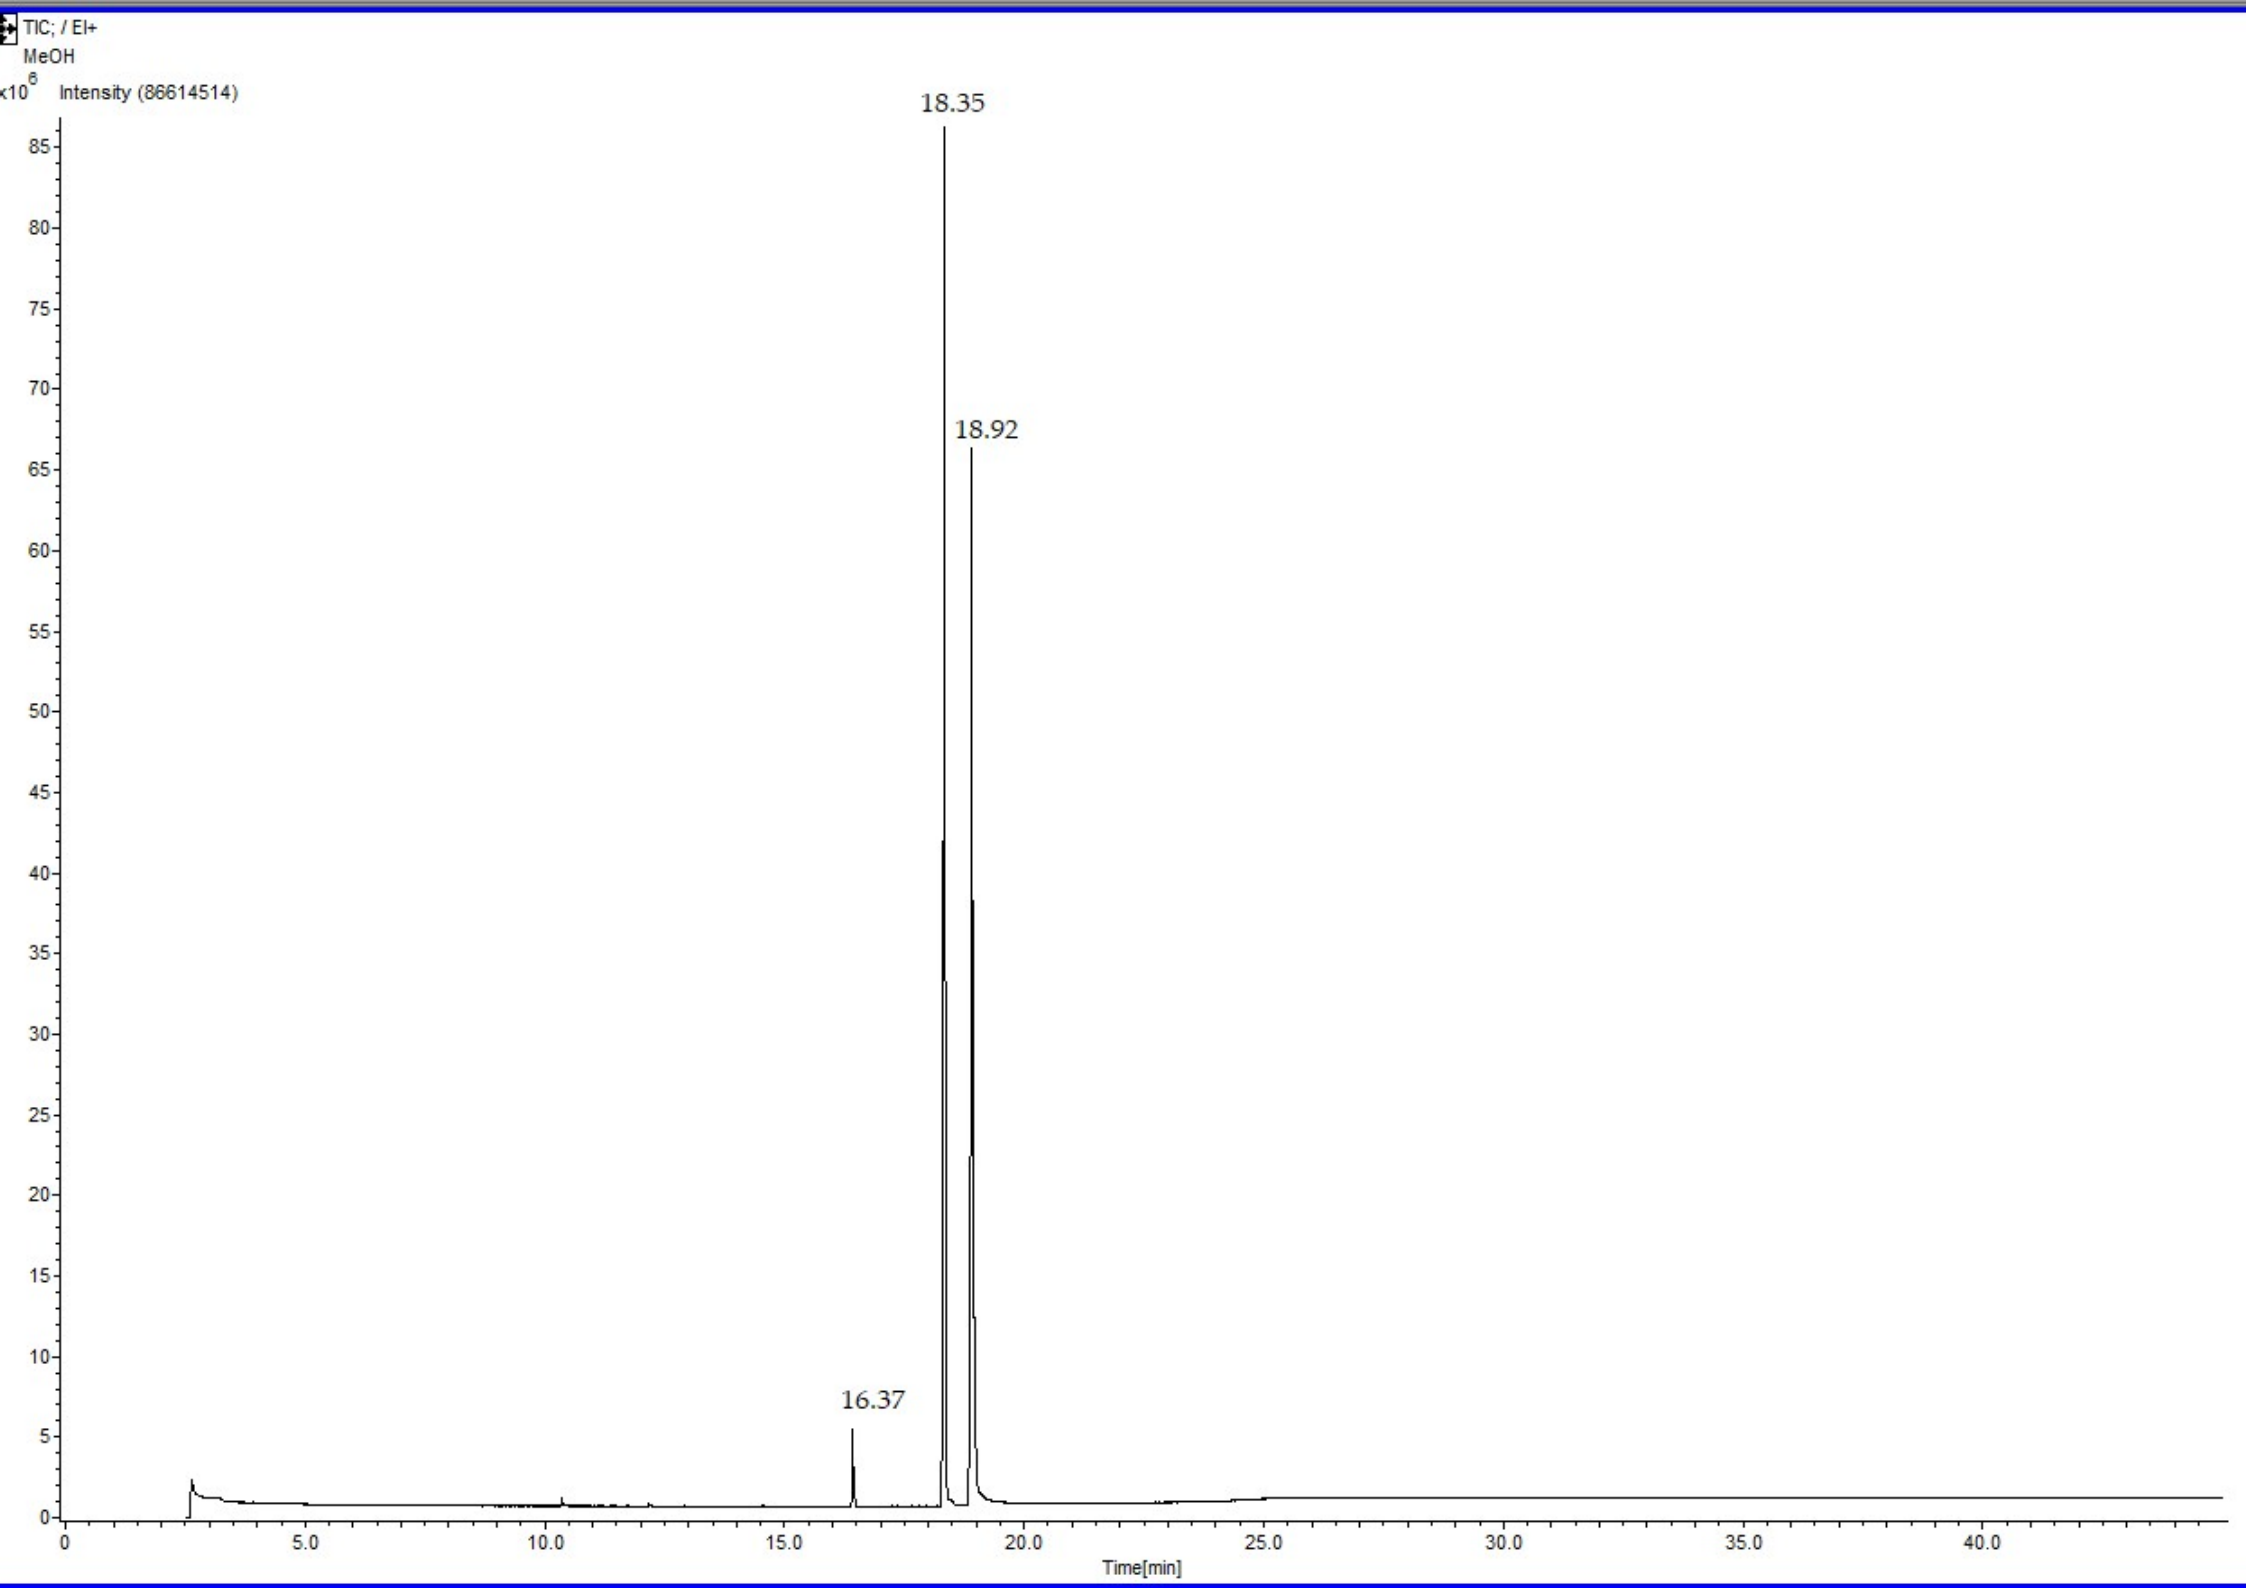

Supplement: s1 [file s1]

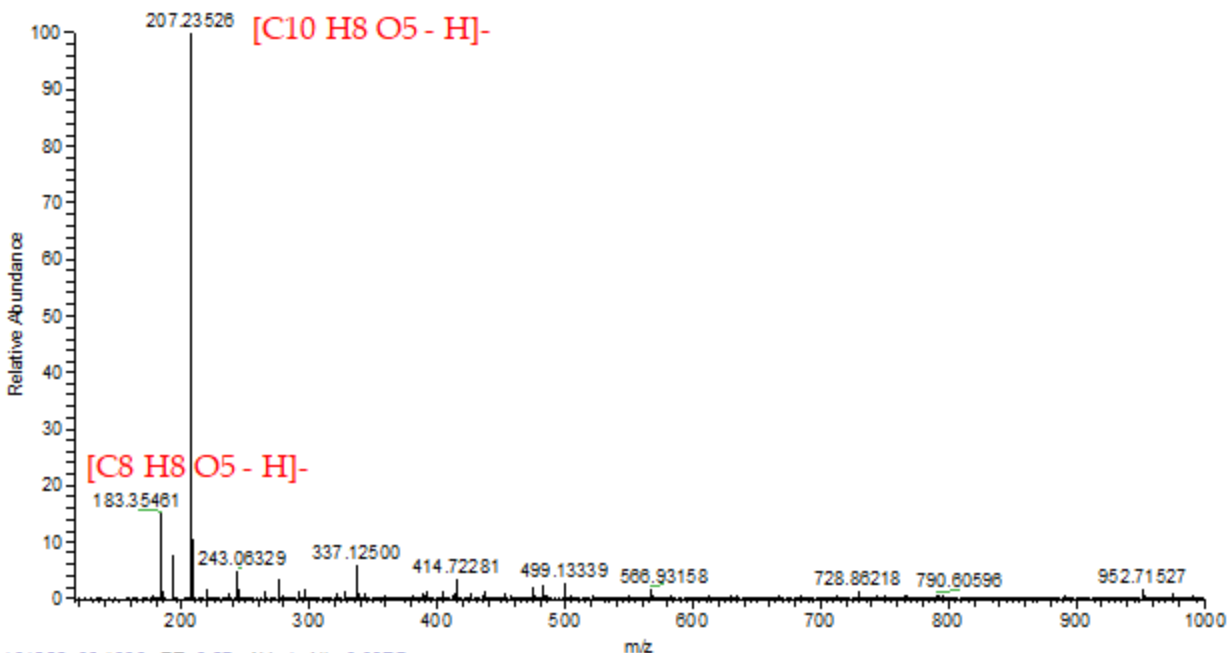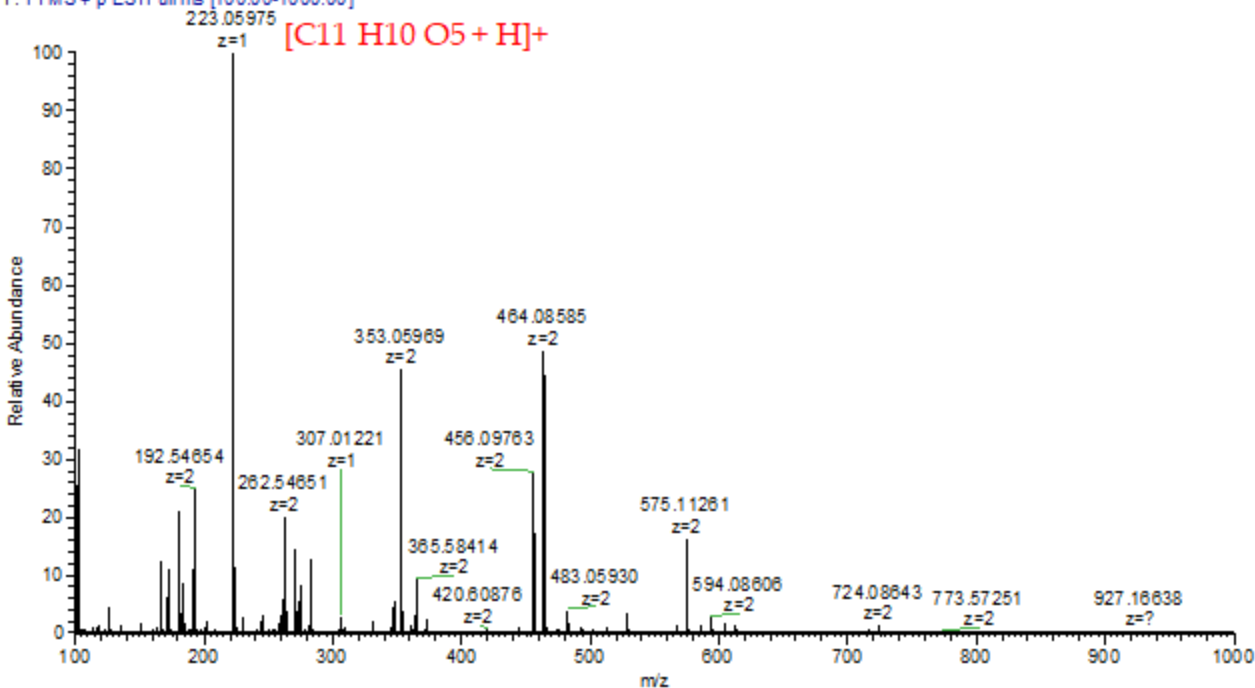

Supplement: s1 [file s1]

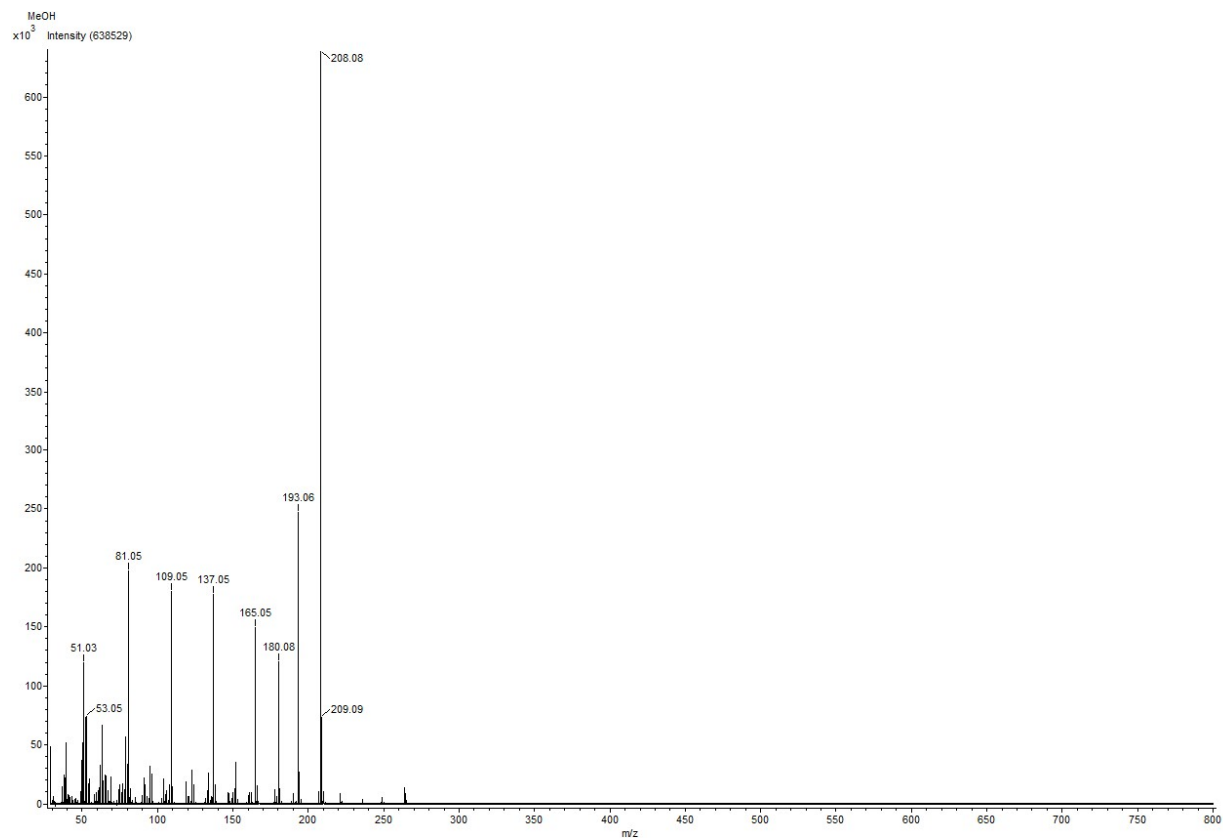

Supplement: s1 [file s1]

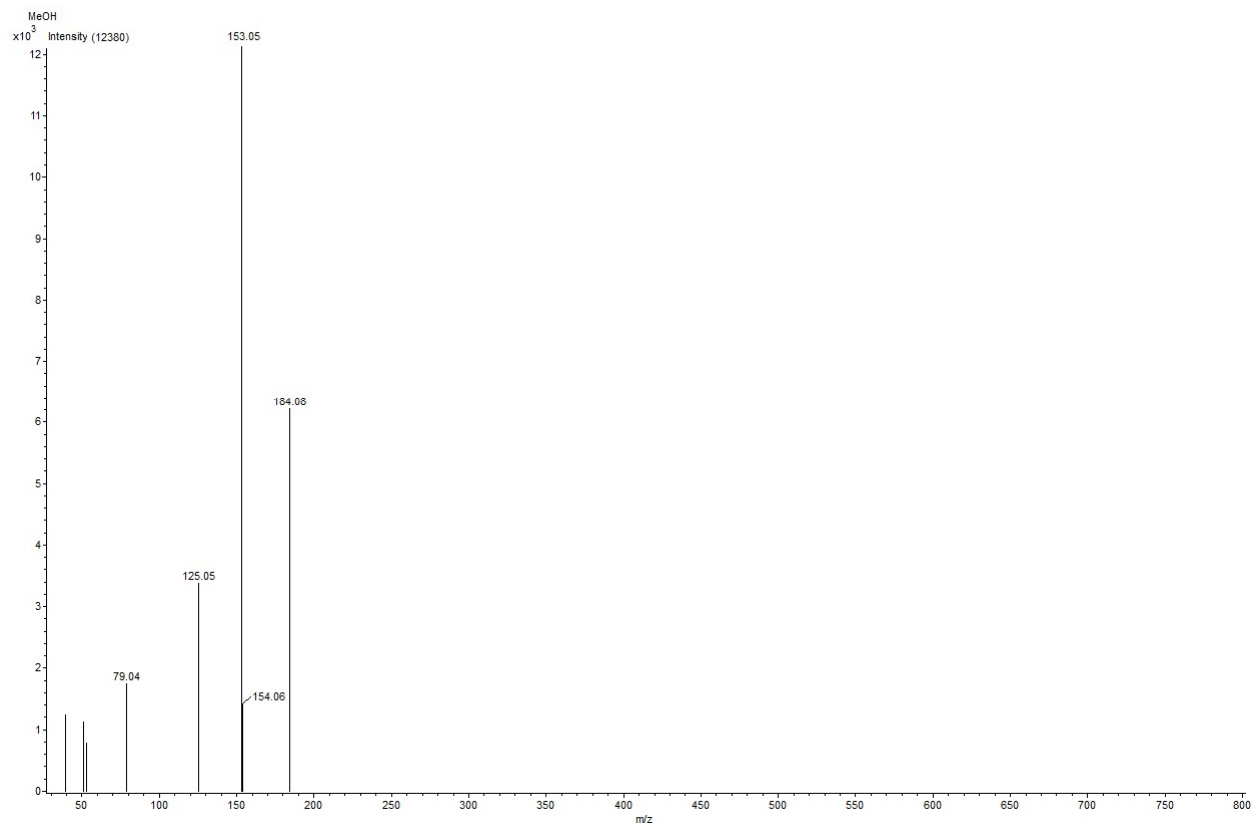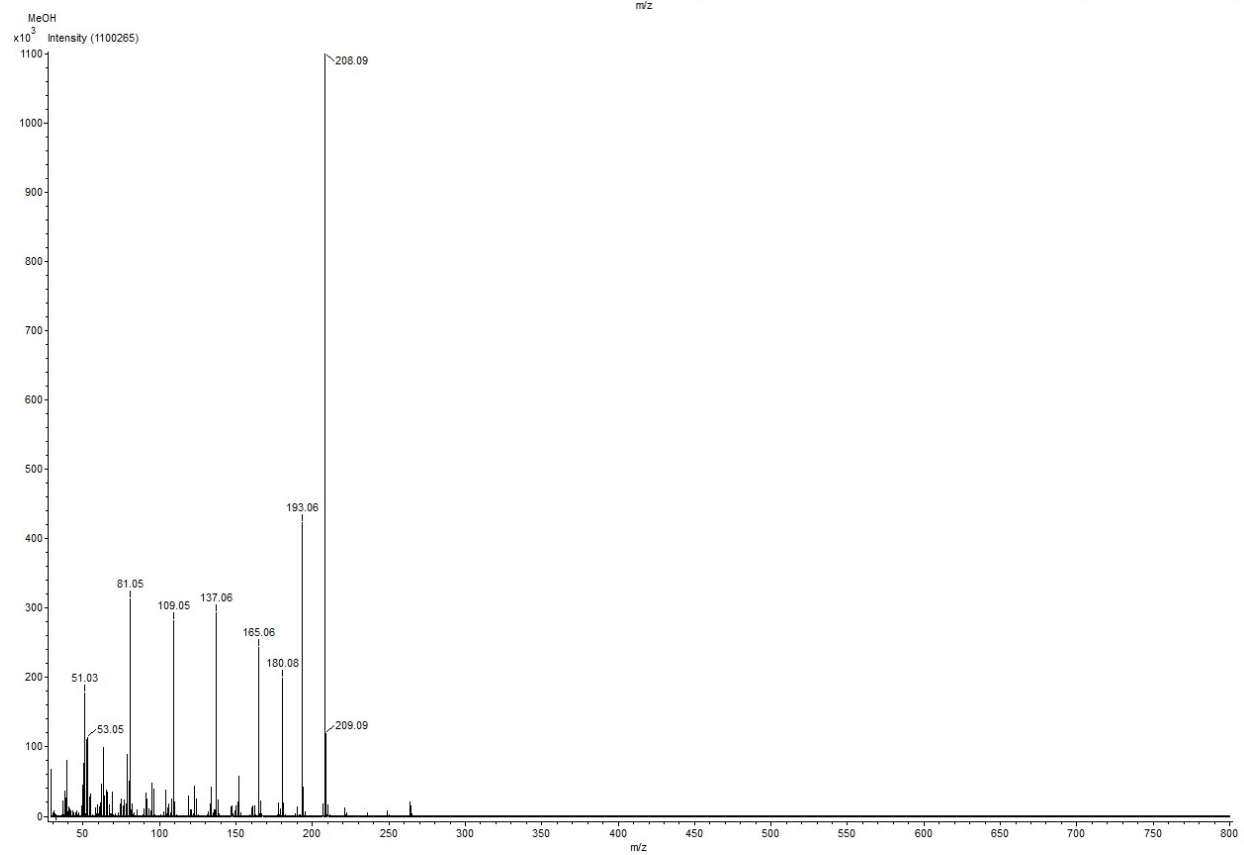

Supplement: s1 [file s1]

## ESI-MS spectrum (Negative ion mode)

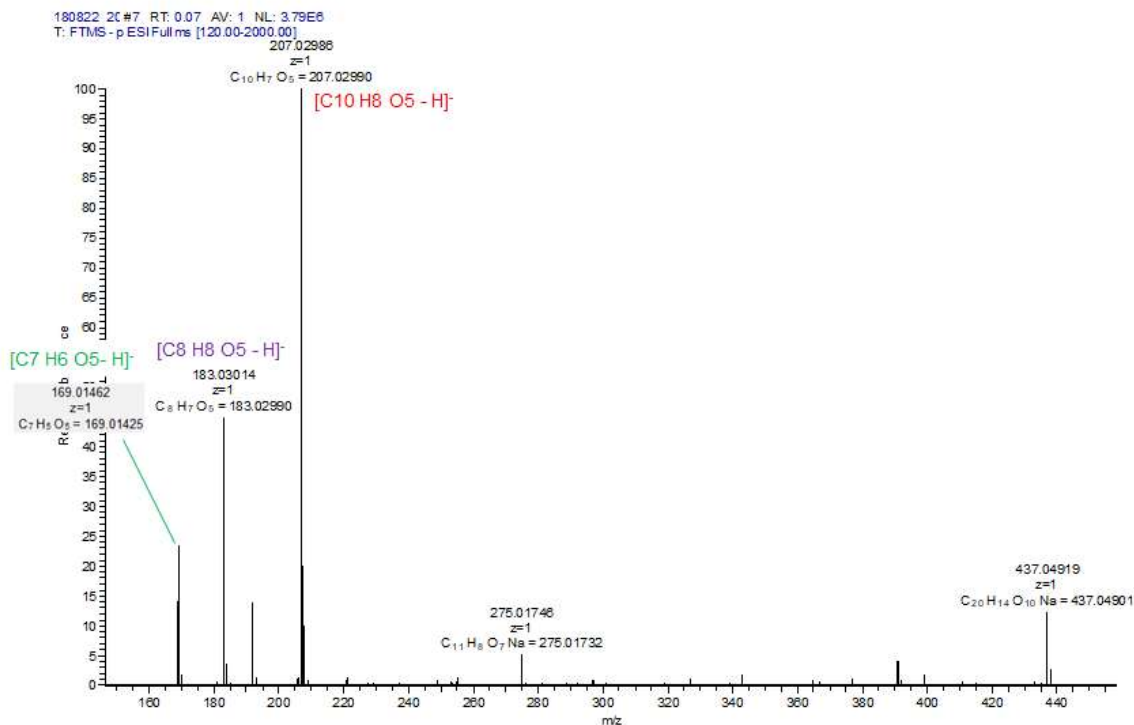

## ESI-MS spectrum (Positive ion mode)

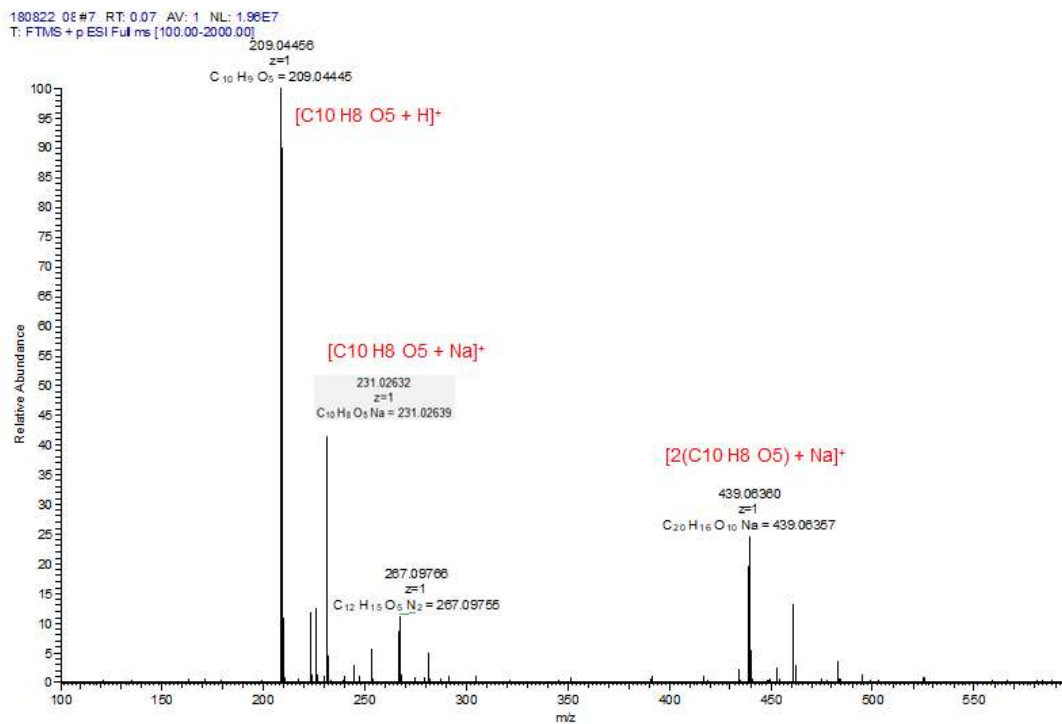

Supplement: s1 [file s1]

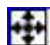

TIC: / EI+

MeOH

$\times 10^6$  Intensity (64965508)

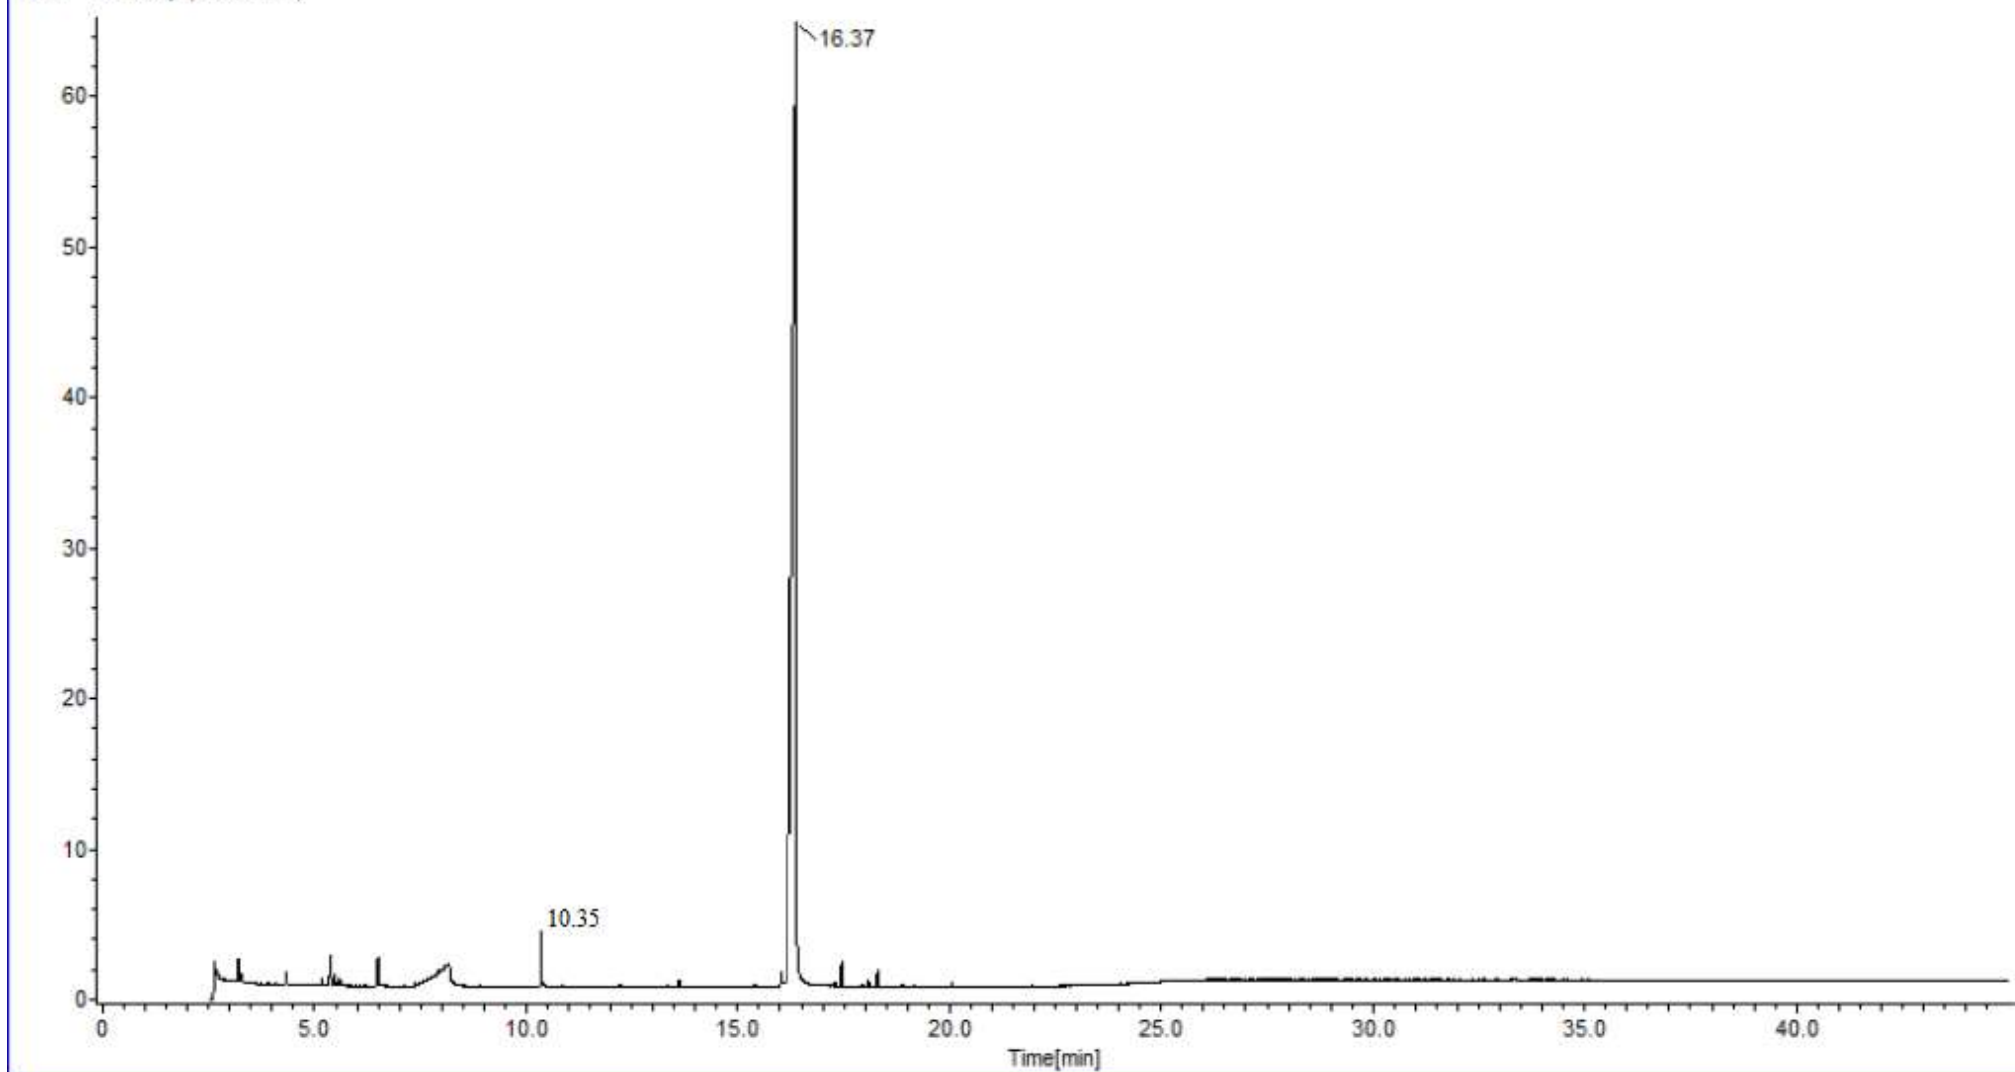

Supplement: s1 [file s1]

## TICs (total ion chromatograms) ITMS, Negative

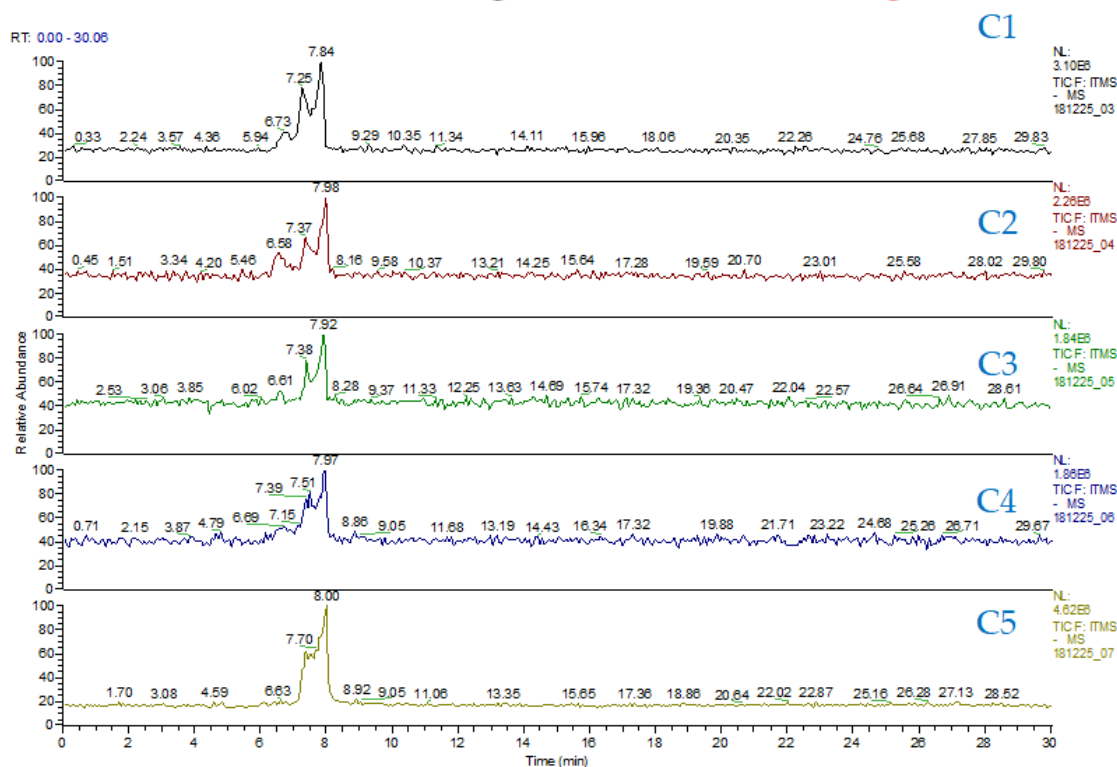

## TICs (total ion chromatograms) FTMS, Positive

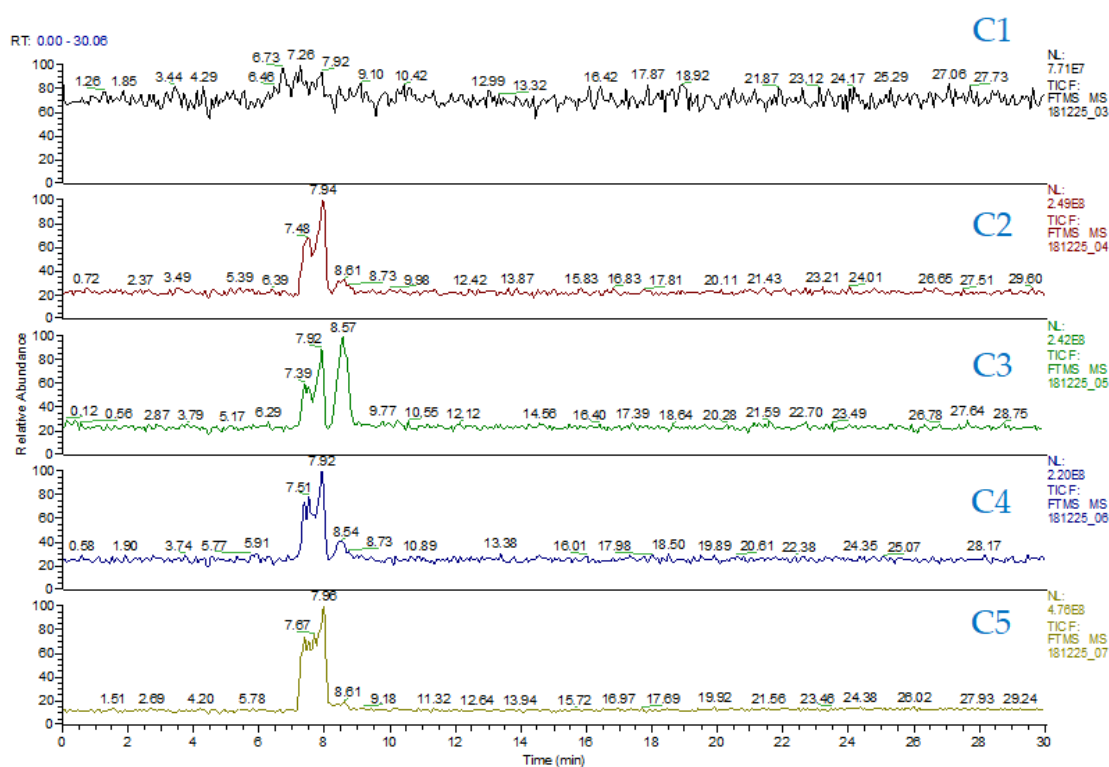

Supplement: s1 [file s1]

181225\_03#470 RT: 6.20 AV: 1 NL: 1.24E2  
T: ITMS - c ESI Full ms [115.00-1000.00]

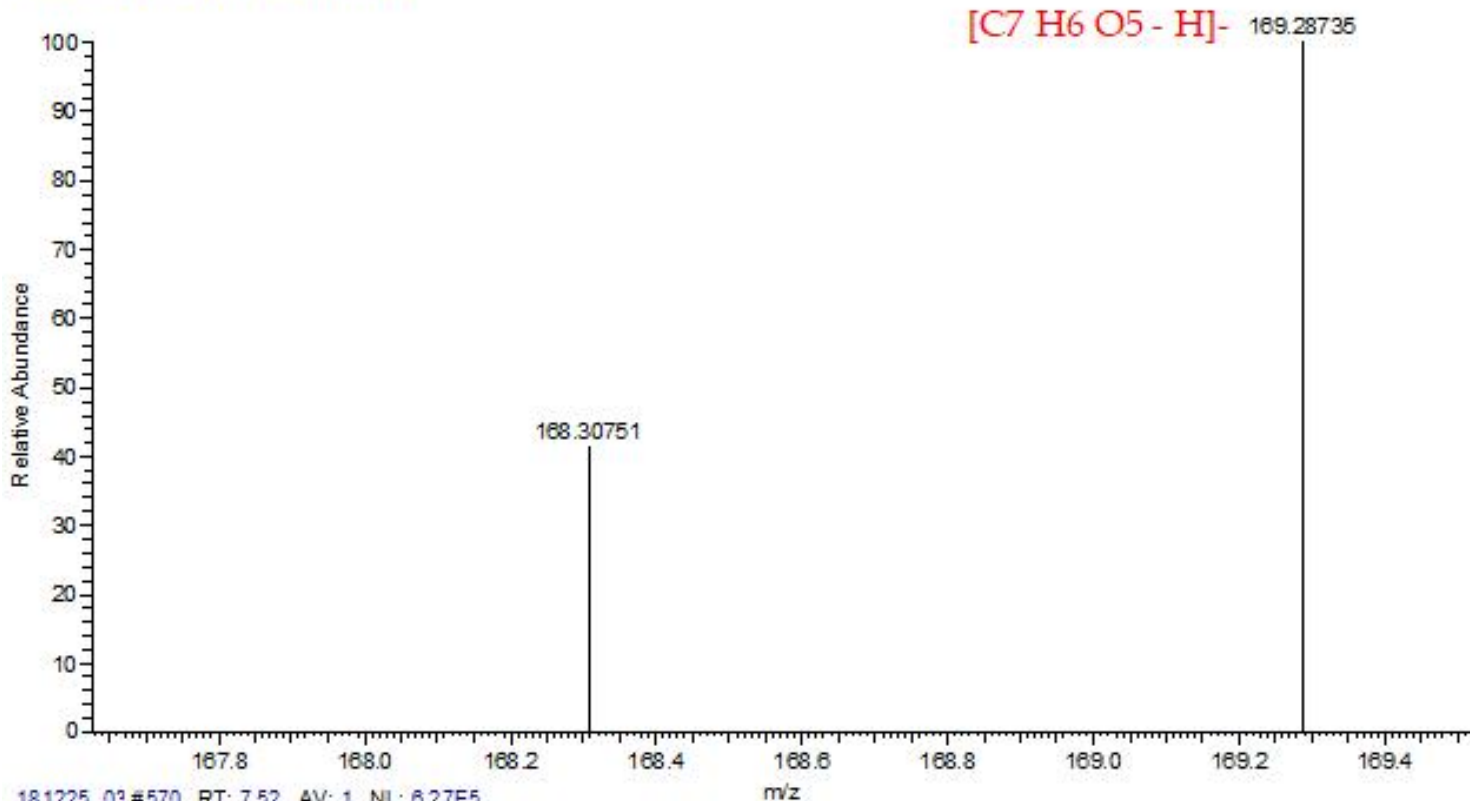

181225\_03#570 RT: 7.52 AV: 1 NL: 6.27E5  
T: ITMS - c ESI Full ms [115.00-1000.00]

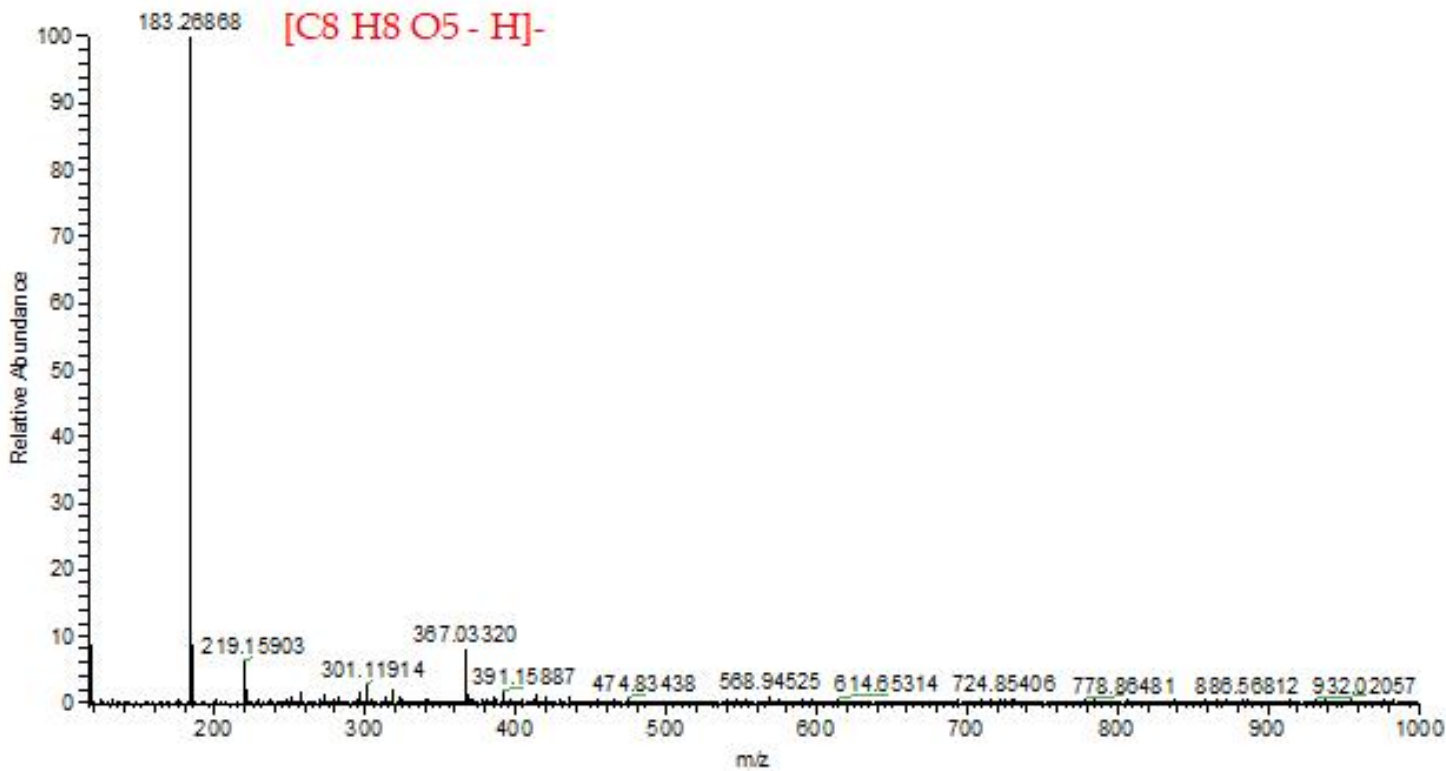

Supplement: s1 [file s1]

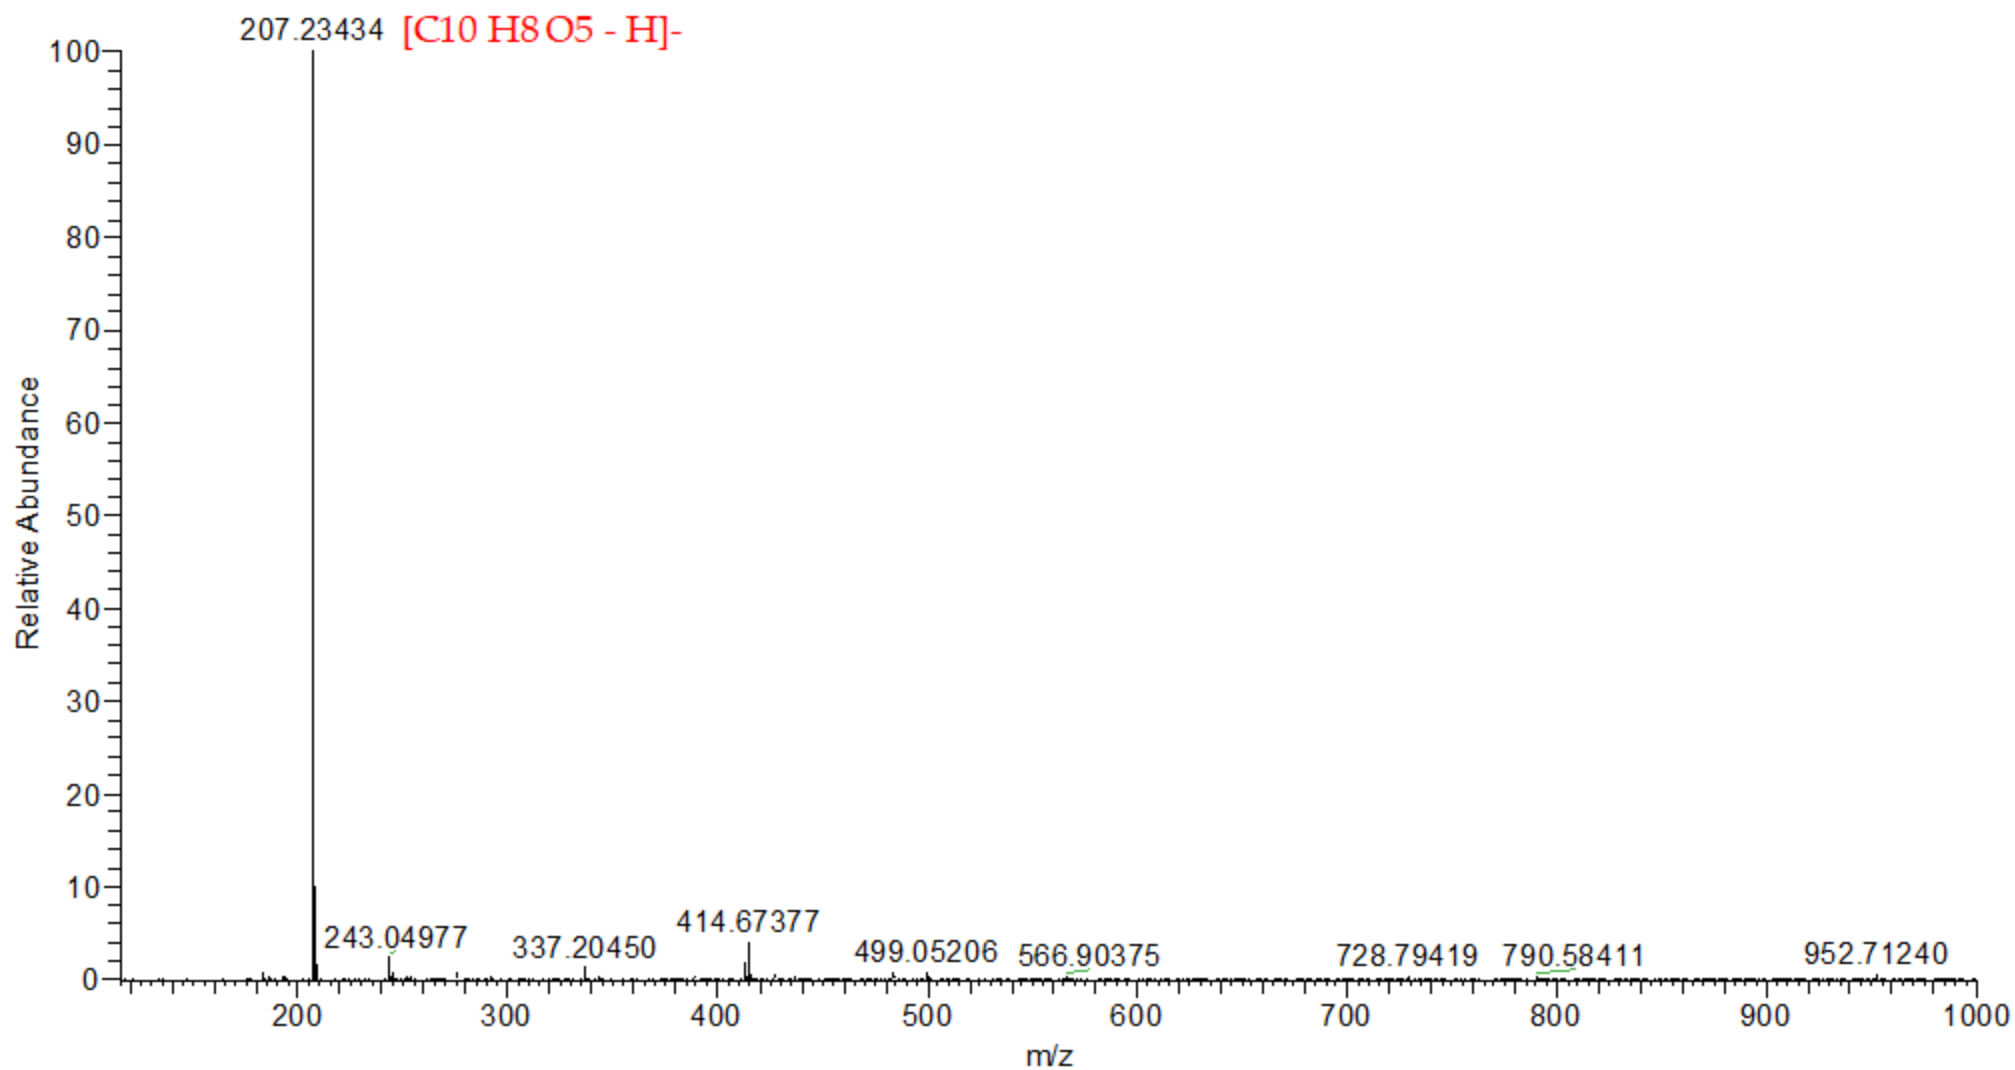

Supplement: s1 [file s1]

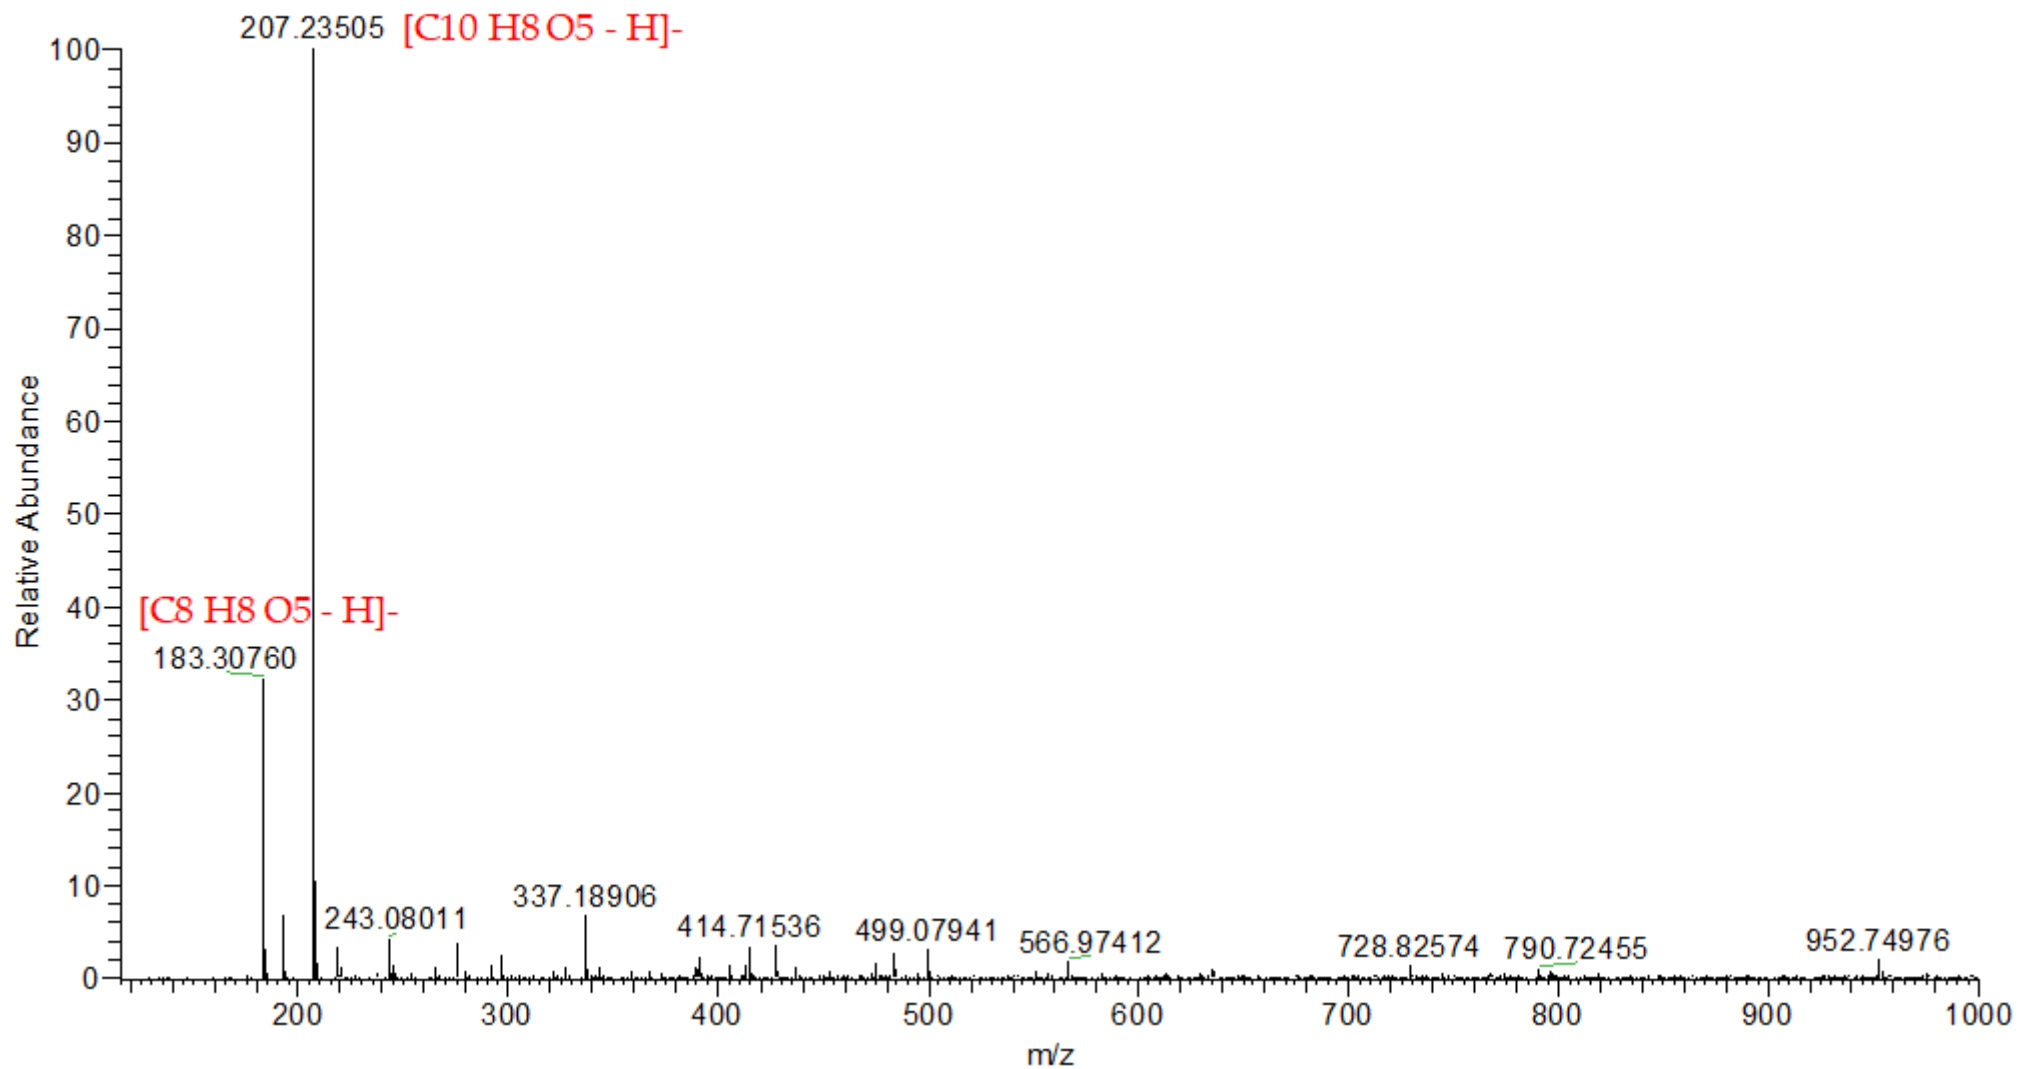

Supplement: s1 [file s1]

TIC: / EI+  
MeOH  
x10<sup>6</sup> Intensity (59743770)

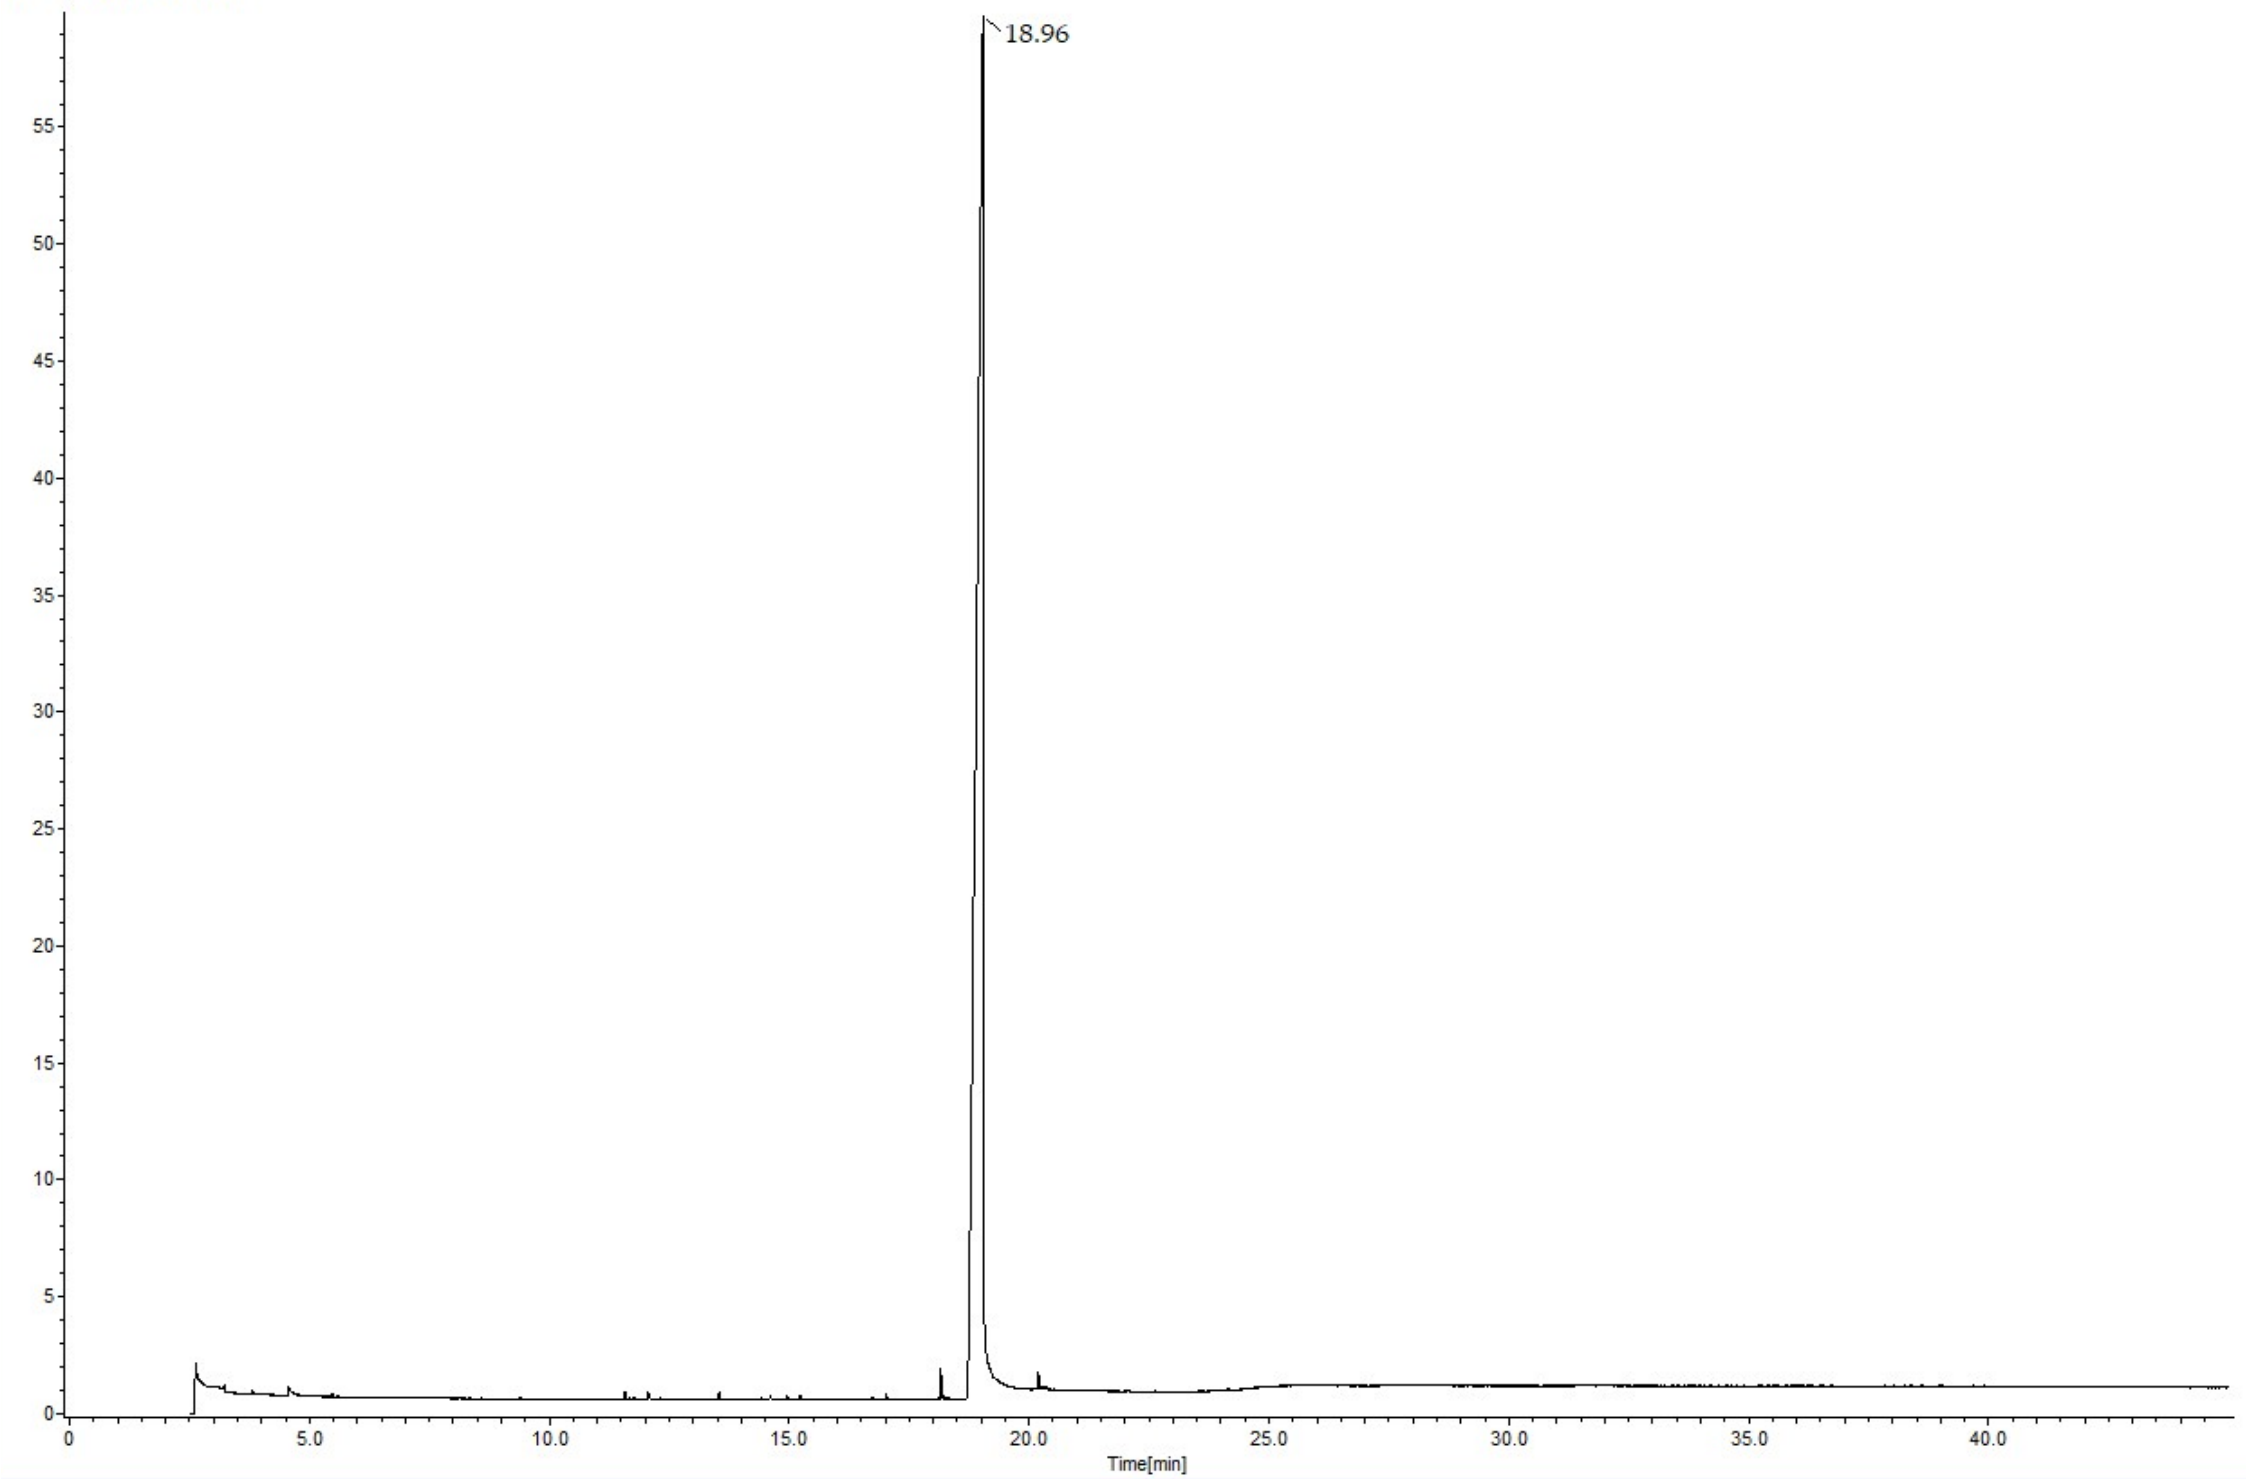

Supplement: s1 [file s1]

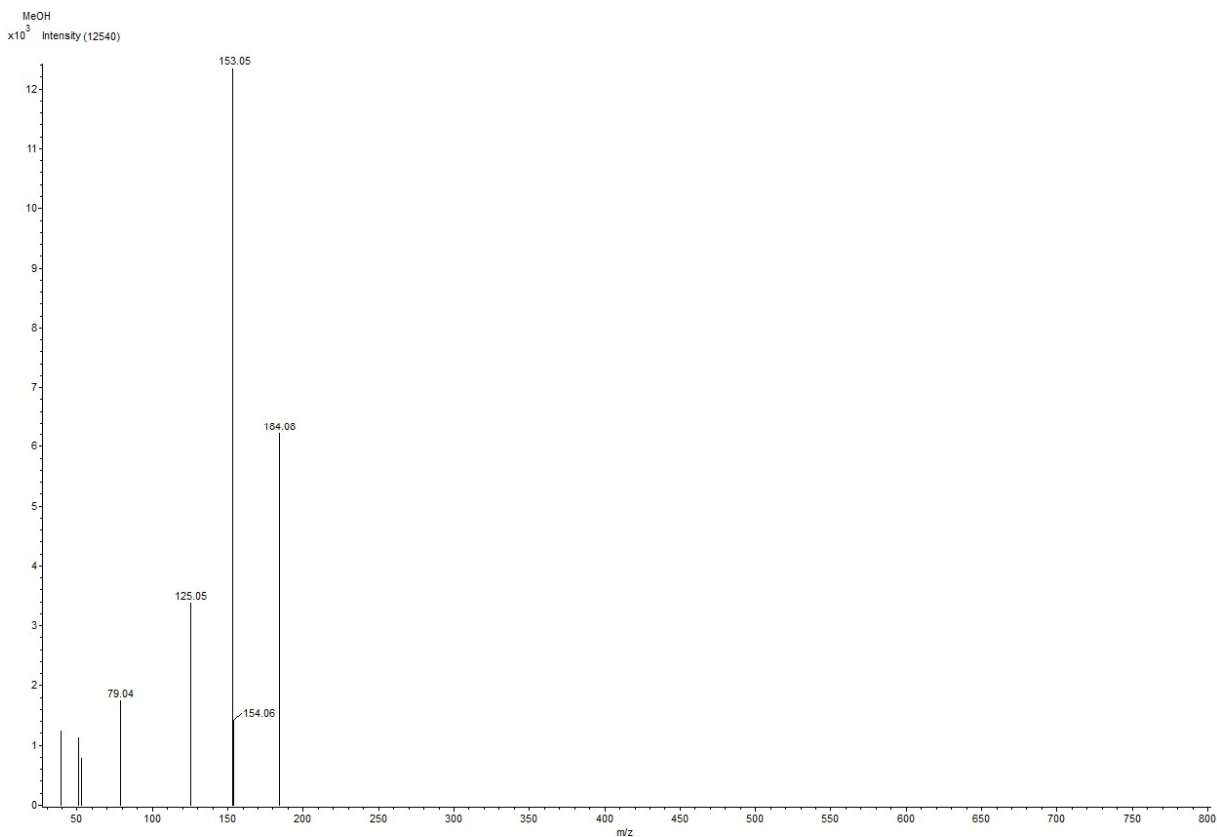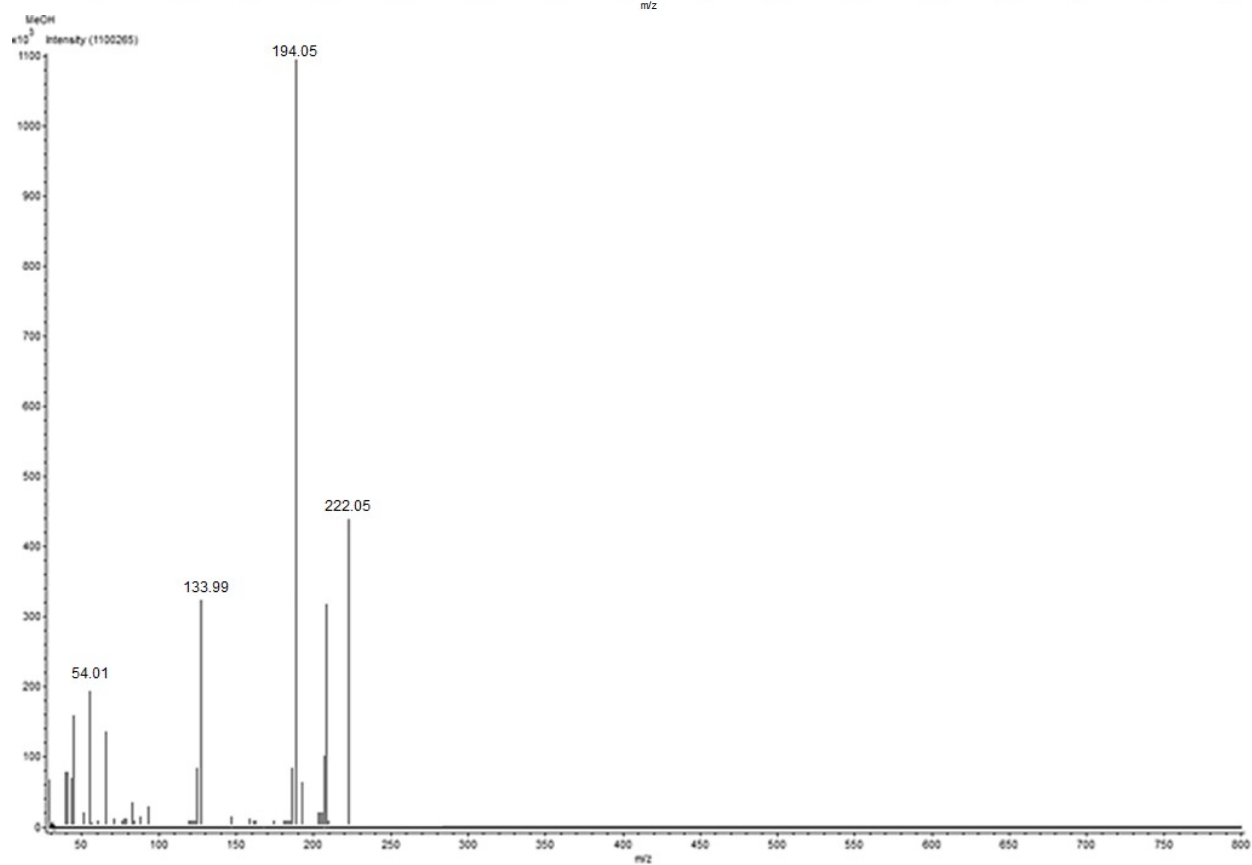

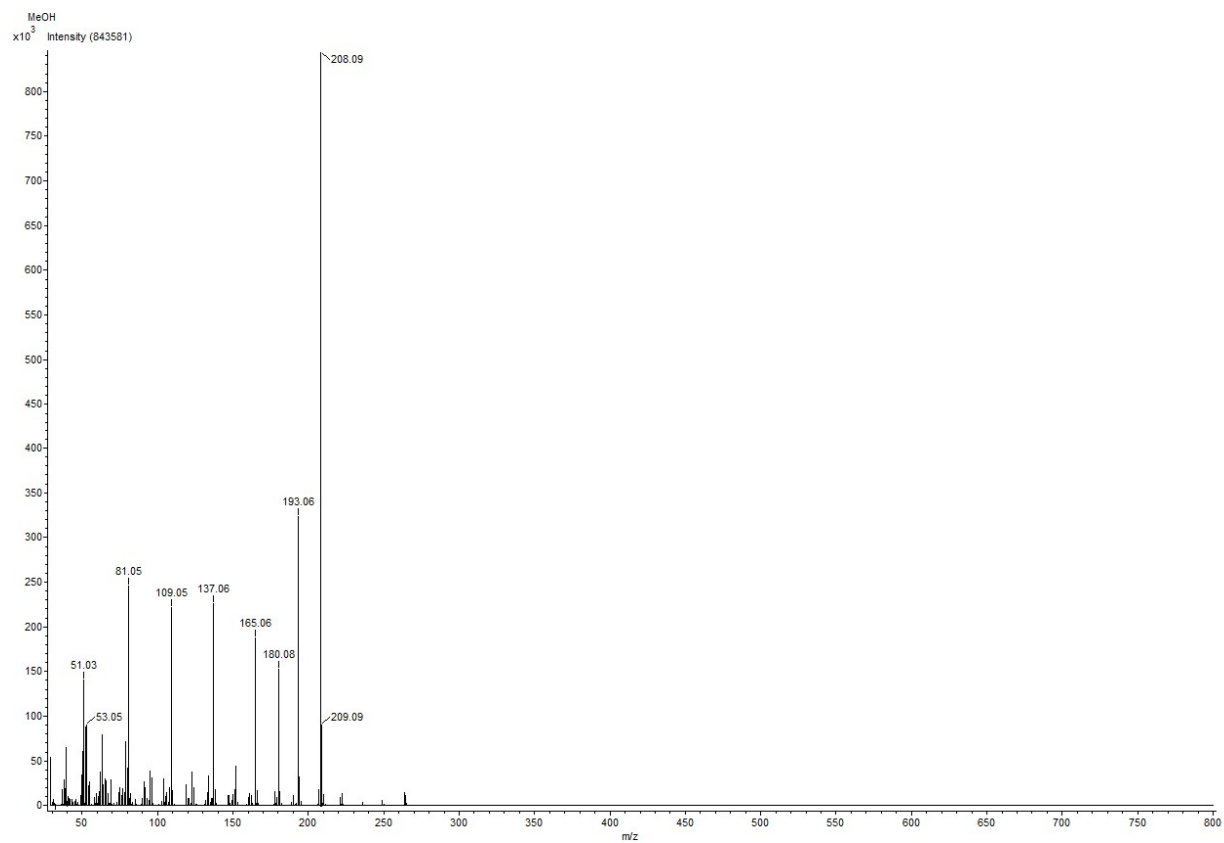

Spectrum c4

Supplement: s1 [file s1]

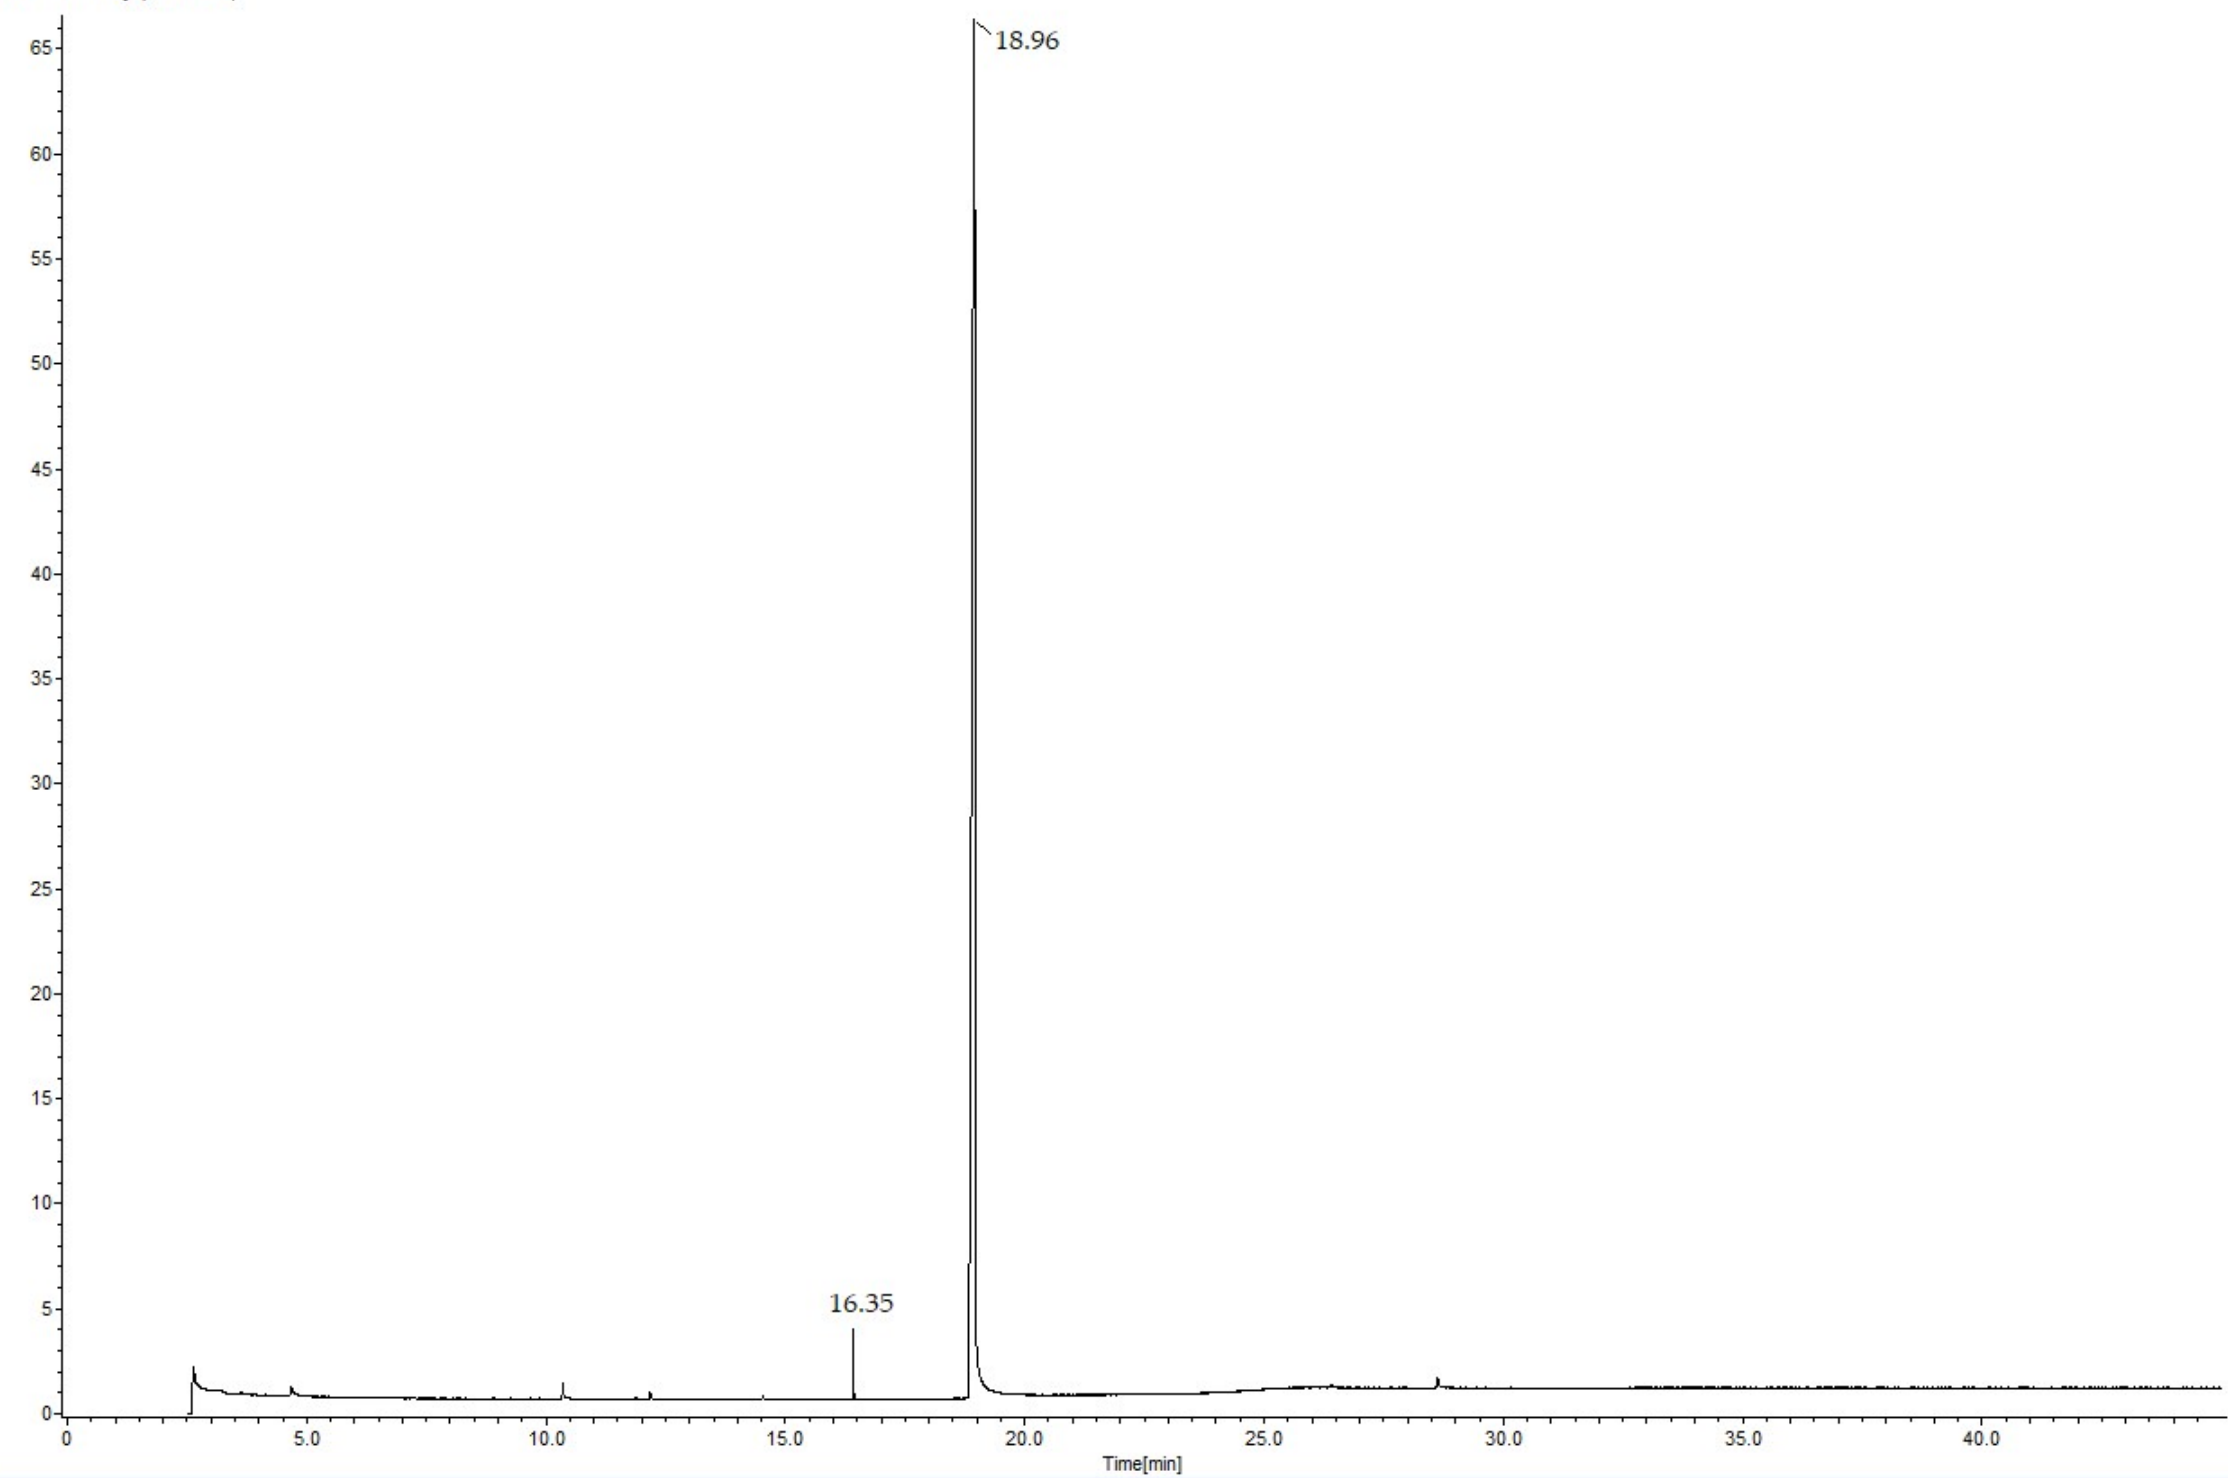

Supplement: s1 [file s1]
